1 **Transcriptional and chromatin-based partitioning mechanisms uncouple protein**  
2 **scaling from cell size**

3

4 Matthew P. Swaffer<sup>1</sup>, Devon Chandler-Brown<sup>1</sup>, Jacob Kim<sup>1</sup>, Maurice Langhinrichs<sup>1</sup>, Georgi Marinov<sup>2</sup>,  
5 William Greenleaf<sup>2</sup>, Anshul Kundaje<sup>2</sup>, Kurt M. Schmoller<sup>1,3</sup>, Jan M. Skotheim<sup>1\*</sup>

6

7 <sup>1</sup> Department of Biology, Stanford University, Stanford CA, 94305, USA

8 <sup>2</sup> Department of Genetics, Stanford University, Stanford CA, 94305, USA

9 <sup>3</sup> Institute of Functional Epigenetics, Helmholtz Zentrum München, 85764 Neuherberg, Germany

10

11 \* correspondence: [skotheim@stanford.edu](mailto:skotheim@stanford.edu)

12

13 **Summary**

14

15 Biosynthesis scales with cell size such that protein concentrations generally remain constant as cells  
16 grow. As an exception, synthesis of the cell-cycle inhibitor *Whi5* ‘sub-scales’ with cell size so that its  
17 concentration is lower in larger cells to promote cell-cycle entry. Here, we find that a transcriptional  
18 control uncouples *Whi5* synthesis from cell size and, screening for similar genes, identify histones as  
19 the major class of sub-scaling transcripts besides *WHI5*. Histone synthesis is thereby matched to  
20 genome content rather than cell size. Such sub-scaling proteins are challenged by asymmetric cell  
21 division because proteins are typically partitioned in proportion to new-born cell volume. To avoid this  
22 fate, *Whi5* uses chromatin-binding to partition similar protein amounts to each new-born cell regardless  
23 of cell size. Finally, disrupting both *Whi5* synthesis and chromatin-based partitioning compromises G1  
24 size control. Thus, specific transcriptional and partitioning mechanisms determine protein sub-scaling  
25 to control cell size.

26 A striking feature of cell growth is that total protein and RNA amounts per cell increase approximately  
27 in proportion to cell volume as a cell grows (Fig. 1A) (Fraser and Nurse, 1978, 1979). To achieve this  
28 coordinated scaling of macromolecules with cell size, larger cells have higher transcription and protein  
29 synthesis rates (Creanor and Mitchison, 1982; Elliott, 1983; Elliott and McLaughlin, 1979; Elliott et al.,  
30 1979; Padovan-Merhar et al., 2015; Sun et al., 2020; Zhurinsky et al., 2010). This size-scaling is of  
31 general importance because it ensures macromolecule copy number is proportional to cell volume and  
32 therefore concentrations are kept constant as a cell grows (Fig. 1B) (Marguerat and Bahler, 2012;  
33 Neurohr et al., 2019). Nuclear volume also scales in proportion to cell volume meaning that nuclear  
34 concentrations are also expected to be constant (Jorgensen et al., 2007; Neumann and Nurse, 2007).

35 The importance of this biosynthetic size-scaling is underscored by experiments where cells  
36 are genetically manipulated to be excessively large. In these cases, protein and RNA synthesis can  
37 no longer keep pace with the expanding cell volume and the cytoplasm starts to dilute (Neurohr et al.,  
38 2019; Zhurinsky et al., 2010). This cytoplasmic dilution results in the failure of many key cellular  
39 processes including cell cycle progression and conditional gene expression programs (Neurohr et al.,  
40 2019; Zhurinsky et al., 2010). Importantly, this breakdown in biosynthesis only occurs in extremely  
41 large cells. To prevent themselves from becoming excessively large, proliferating cells coordinate cell  
42 division with cell growth so that cells born small compensate for their initially smaller size by growing  
43 more before entering the cell division cycle (Johnston et al., 1977; Turner et al., 2012).

44 The processes of cell size control and of biosynthetic scaling are deeply connected because  
45 one mechanism of size control relies on the differential scaling of cell cycle regulators with cell size.  
46 While it is generally assumed that most individual proteins exhibit the general size-scaling behavior  
47 and therefore remain at constant concentration, one notable exception is the cell cycle inhibitor Whi5  
48 whose synthesis *sub-scales* with cell size (Schmoller et al., 2015) (Fig. 1B). Whi5 synthesis occurs  
49 during the S/G2/M stages of the cell cycle before Whi5 is translocated into the nucleus at the end of  
50 mitosis to inhibit the cell cycle SBF transcription factor in the following G1. Quantification of the  
51 synthesis rate of Whi5 in individual cells has revealed that Whi5 synthesis *sub-scales* with cell size so  
52 that an approximately constant amount of Whi5 is made in each cell cycle independent of cell size and  
53 global biosynthetic capacity (Schmoller et al., 2015). Whi5 concentration is then diluted in G1 as cells  
54 grow, reducing the inhibition of SBF activity and promoting cell-cycle entry in larger cells. Interestingly,  
55 examination of Whi5 synthesis in a variety of extracellular growth conditions showed that a similar  
56 number of molecules are made in all conditions. Whi5 synthesis is thus uncoupled from the cellular  
57 growth rate as well as cell size (Qu et al., 2019). In contrast, most other proteins' synthesis is assumed  
58 to increase with cell size due in accordance with the global scaling trend. Thus, cell size determines  
59 the pattern of differential protein biosynthesis, which promotes division in larger cells to, in turn, control  
60 cell size.

61 This idea of cell cycle regulators differentially scaling during G1 has been expanded on by  
62 recent work in budding yeast examining cells arrested in G1 for increasing amounts of time. This  
63 revealed that as a G1 arrest is prolonged, some cell cycle activators increase in concentration while  
64 some cell cycle inhibitors decreased in concentration to promote the cell cycle entry of larger cells  
65 (Chen et al., 2020). Such a size-dependent concentration increase was first observed in the fission  
66 yeast *S. pombe* for the cell cycle activator *cdc25* (Keifenheim et al., 2017).

67 Despite this progress, the underlying molecular mechanisms determining the relationship  
68 between cell size and the expression of individual proteins remain largely unknown. It is both unclear  
69 what mechanisms scales most biosynthesis with cell size and also what additional mechanisms  
70 uncouple the synthesis of sub-scaling proteins such as Whi5 from the general trend. It also remains  
71 unknown how pervasive sub-scaling behavior is and which other categories of proteins sub-scale to  
72 differentially coordinate other aspects of cell biology with cell size.

73 To address these questions at the heart of how protein synthesis scales with cell size, we have  
74 used multiple orthogonal high-throughput and single-cell approaches. We identified a transcriptional  
75 control mechanism uncoupling Whi5 synthesis from cell size. Besides *WHI5*, we identified histones as  
76 the major class of sub-scaling gene products by analyzing the transcriptome of differently sized cells  
77 progressing through the cell cycle. For stable proteins such as Whi5, we show how asymmetry in cell  
78 division presents a challenge to their sub-scaling expression. This is because the default manner in  
79 which proteins are partitioned is in proportion to the volume of the new-born cell which would result in  
80 the smaller daughter cell inheriting proportionally less protein – effectively undoing the sub-scaling  
81 synthesis of the preceding cell cycle. To avoid this fate, Whi5 uses chromatin-binding to segregate a  
82 similar number of protein molecules to each new-born cell regardless of their size. Finally, we disrupted  
83 both Whi5 synthesis sub-scaling and Whi5's chromatin-based partitioning and show that together  
84 these mechanisms are required for G1 size control in budding yeast.

85

## 86 ***WHI5* mRNA does not scale with cell size**

87 First, we set out to determine at what stage of gene expression Whi5 sub-scaling originates.  
88 In principle, any step of gene expression could be regulated in a manner that results in sub-scaling  
89 protein levels (Fig. 1C). Importantly, for Whi5 this is not achieved through negative feedback on gene  
90 product levels because multiple copies of the *WHI5* gene result in a proportional increase in the  
91 number of proteins made per cell cycle (Qu et al., 2019; Schmoller et al., 2015). To determine whether  
92 Whi5's sub-scaling behavior originates at the protein or transcript level we isolated cells of different  
93 sizes by FACS using total cellular protein content as a proxy for cell size. To do this we stained cells  
94 with an amine reactive NHS ester dye which binds bulk protein, sorted cells into four bins based on  
95 dye intensity and performed RNA-seq on each bin (Fig. 1D & S1A). The protein dye intensity in each

96 bin was well correlated with total mRNA content and cell volume, confirming the protein dye as a good  
97 general proxy for cell size (Fig. S1B-E). Total mRNA was quantified by adding a *S. pombe* spike-in  
98 before RNA extraction and then determining the ratio of cerevisiae to *S. pombe* reads, and cell volume  
99 was measured by coulter counter after sorting. *WHI5* mRNA transcripts per million (TPM) decreased  
100 as cell size increased, which implies that the *WHI5* mRNA concentration is lower in larger cells. In  
101 contrast, *MDN1* mRNA TPM, as representative of scaling gene expression, was constant (Fig 1E).

102 We then normalized the TPM value to the total mRNA amount per cell, determined relative to  
103 the *S. pombe* spike-in, to get an estimate of the relative transcript amount per cell. When normalized  
104 to total mRNA, *WHI5* mRNA amount per cell was constant as a function of size (Fig. 1F). To  
105 corroborate this finding, we performed single-molecule FISH in individual cells while also measuring  
106 the size of each individual cell (Fig 1G). Consistent with the RNA-seq data, the number of *WHI5*  
107 transcripts per cell did not increase with cell size whereas the *MDN1* counts did (Fig. 1H-I & S3A-B).

108

### 109 **Cell cycle analysis of *WHI5* sub-scaling**

110 Next, we sought to test if the apparent sub-scaling behavior of *WHI5* mRNA is simply a  
111 consequence of the cell cycle rather than cell size *per se*. This is a possibility because *WHI5* mRNA  
112 is a cell cycle regulated transcript that peaks in S phase (Pramila et al., 2006) (Fig. S3D) and cells  
113 later in the cell cycle will on average tend to be larger. To control for this possibility, we isolated cells  
114 in early G1 by centrifugal elutriation and arrested them in G1 for increasing amounts of time to generate  
115 populations of cells of increasing sizes. Cells were then released from the G1 arrest resulting in  
116 cultures of cells synchronously traversing the entire cell cycle but at different sizes, which we then  
117 sampled for RNA-seq analysis (Fig. 2A-B & S2). *WHI5* TPM are indeed lower in larger cells as *WHI5*  
118 expression peaks in S phase (Fig. 2C). The total amount of *WHI5* expression across the entire cell  
119 cycle can then be estimated as the area under the curve, which again shows that *WHI5* mRNA  
120 concentrations decrease as cell size increases (Fig. 2D).

121 Consistent with this, if we restrict our smFISH analysis to only those cells in early S/G2/M,  
122 when *WHI5* expression peaks, the number of *WHI5* transcripts is still uncorrelated with cell size (Fig.  
123 2E & S3E-F). Taken together, this group of experiments suggests that *WHI5* transcript levels are  
124 responsible for the sub-scaling expression of Whi5 protein.

125

### 126 ***WHI5* sub-scaling is encoded in its promoter**

127 Next, we sought to test whether Whi5 sub-scaling is encoded in its promoter. If this were the  
128 case, then the *WHI5* promoter should be both necessary and sufficient for sub-scaling protein  
129 expression. To test if the *WHI5* promoter is sufficient, we compared the size-dependency of Whi5-  
130 mCitrine protein expressed from its endogenous promoter with that of a reporter mCitrine also  
131 expressed from the *WHI5* promoter. Both Whi5-mCitrine and the mCitrine reporter are synthesized in

132 a sub-scaling manner indicating that the *WHI5* promoter is sufficient for *WHI5* sub-scaling synthesis  
133 (Fig. 2F-G). In contrast, when we expressed *Whi5-mCitrine* from a scaling promoter (*ACT1pr*) its  
134 synthesis rate increases with cell size (Fig. 2H). Together, these experiments suggest that *WHI5* is  
135 transcribed in a sub-scaling manner and that the *WHI5* promoter is both necessary and sufficient for  
136 the sub-scaling synthesis pattern of *Whi5*.

137

### 138 **Histones are a rare class of sub-scaling genes**

139 Having shown that sub-scaling expression of *WHI5* is due to a transcriptional mechanism, we  
140 sought to determine which other cellular processes are similarly uncoupled from cell size. To do this,  
141 we analyzed our RNA-seq experiments of different sized cells. We found 15 transcripts that behaved  
142 similarly to *WHI5* in both the size-sort and the elutriation arrest-release experiment (Figure S4A).  
143 These genes are enriched for GO terms related to chromatin and revealed histones as the major class  
144 of sub-scaling genes, as 9 of the 15 identified genes encode histones (Fig. 3A). Histone mRNAs TPMs  
145 are clearly lower in the larger sorted cells than the smaller ones (Fig. 3B & S4B). As for *WHI5*, this is  
146 not a consequence of their cell cycle regulated expression because the same trend was observed in  
147 the timecourse experiments where cells of different sizes synchronously progressing through the  
148 entire cell cycle (Fig. 3C-D & S4C).

149 We further confirmed the sub-scaling expression of histone transcripts by examining  
150 microarray data of 1,484 strains each containing a single gene deletion (Kemmeren et al., 2014;  
151 O'Duibhir et al., 2014). We compared the level of a given transcript in each deletion strain with the cell  
152 size of the same deletion strain and then calculated the Pearson R coefficient for the correlation  
153 between transcript levels and cell size across all 1,484 deletion strains. We repeated this using four  
154 different cell size datasets acquired as part of independent genome-wide screens utilizing multiple  
155 different methodologies for measuring cell size (Hoose et al., 2012; Jorgensen et al., 2002; Ohya et  
156 al., 2005; Soifer and Barkai, 2014). This revealed a clear negative correlation between histone mRNA  
157 levels and cell size (Fig. 3E & S4D), meaning that histone mRNA concentrations are lower relative to  
158 the rest of the transcriptome in deletion strains with a larger cell size. Indeed, histones populate the  
159 most extreme negative end of the spectrum of transcripts in all four datasets (Fig. 3E). This contrast  
160 to typical transcripts, such as those encoding RNA polymerase II subunits (Fig. S5).

161 We next sought to identify *super-scaling* genes whose mRNA concentrations increase in larger  
162 cells (Fig. S6A). To do this, we again analyzed how gene expression through the cell cycle changes  
163 as a function of cell size (Fig. S1 & S2). This identified a number cell cycle regulated transcripts  
164 including SBF regulated genes such as *CLN2* that super-scale (Fig. 3F-H & S6B-C). That these cell  
165 cycle regulated genes super-scale whereas histones and *WHI5* sub-scale, despite both sets peaking  
166 in expression at a similar time, demonstrates that these differential scaling properties are not due to a

167 conflation of cell cycle progression with cell size. Consistent with this conclusion, many other cell cycle  
168 regulated transcripts, including the B-type cyclins, do not sub-scale (S6D-E).

169

### 170 **Histone protein synthesis is similarly uncoupled from cell size**

171 The sub-scaling expression of histone mRNAs suggests that histone protein expression is  
172 coordinated with genome content rather than cell size and predicts that histone protein synthesis  
173 should also not scale proportionally with cell size. To examine this, we first analyzed two published  
174 datasets of flow cytometry measurements across the collection of strains in which each individual open  
175 reading frame was fused to GFP (Parts et al., 2014). We compared the relationship between GFP  
176 fluorescence (protein amount) and side scatter (SSC-A, cell size) (Fig. 4A). This revealed that histone  
177 protein amounts show weaker dependence on cell size than the average protein in the proteome, *i.e.*,  
178 the slope between cell size (SSC-A) and GFP intensity is smaller (Fig. 4B-C). To confirm that histone  
179 protein synthesis does indeed sub-scale, we quantified the amount of histones synthesized across the  
180 cell cycle in single cells using time-lapse fluorescence microscopy and compared it with the increase  
181 in cell volume during the same period. While the protein synthesis of the RNA polymerase II subunit  
182 Rpb3 scales with cell size, the protein synthesis of histones Hta2, Htb2 and Htz1 clearly sub-scale  
183 with size (Fig. 4D-E). Taken together, these experiments identified histones as a rare class of sub-  
184 scaling genes whose transcription and protein synthesis are uncoupled from cell size. In this way,  
185 histone production can be matched with genome-content rather than cellular growth.

186

### 187 **Inheritance of sub-scaling protein levels requires chromatin-based partitioning**

188 Both Whi5 and histones are stable proteins synthesized in a sub-scaling manner during  
189 S/G2/M of the cell cycle, meaning that their amounts in G1 are determined by inheritance from  
190 previous cell cycles. For typical proteins, which are partitioned along with the cytoplasm or  
191 nucleoplasm, concentrations are expected to be similar in the mother and daughter cells following  
192 division, as is observed for a freely diffusing mCitrine (Fig. 5A&B). Thus, the asymmetric division of  
193 budding yeast poses a problem for maintaining the protein-level sub-scaling of Whi5 and histones  
194 because smaller daughter cells would inherit fewer proteins if they were partitioned in proportion to  
195 cell volume. Instead, to maintain size-independent amounts, a mechanism partitioning equal amounts  
196 to the daughter and mother cells is required. This is indeed the case for Whi5, which is not partitioned  
197 evenly by volume as seen by the increased mother-to-bud concentration ratio at cytokinesis (Fig. 5B).  
198 Thus, differently sized G1 cells inherit a more similar amount of Whi5 during cell division than would  
199 be expected for any typical protein partitioned by volume.

200 To obtain a quantitative understanding of the impact of amount- and volume-based partitioning  
201 modalities on the amounts of inherited protein, we employed a full cell-cycle model that simulates  
202 growth and division of a population of budding yeast cells. This model was parameterized by single-

203 cell microscopy measurements and therefore accounts for cell-to-cell variability and the size-  
204 dependence of cell cycle progression (Chandler-Brown et al., 2017). To this model, we added a protein  
205 synthesized either at a rate proportional to cell size (scaling) or independent of cell size (sub-scaling).  
206 At division, these proteins were then either partitioned in proportion to cell-volume or in the manner  
207 empirically determined for Whi5, where most but not all, of the protein is partitioned by amount (Fig.  
208 5D & S7B). Our simulations show that the amount of Whi5 inherited in G1 should scale significantly  
209 more with cell size if it were partitioned according to cell volume rather than by amounts. This is, in  
210 part, because bud size varies significantly even for mothers with the same volume. Together, this  
211 suggests that both partitioning by amount and sub-scaling synthesis should be required to ensure  
212 Whi5 protein sub-scaling in G1.

213 We hypothesized that the amount-based partitioning of Whi5 could be achieved by utilizing  
214 the equal partitioning of the genome during cell division. This possibility was suggested by the fact  
215 that Whi5 binds the DNA-bound SBF transcription factor complex following its dephosphorylation at  
216 mitotic exit. To test this, we analyzed the partitioning of a Whi5 mutant, Whi5(WIQ), that does not bind  
217 SBF and is not recruited to the SBF binding sites in the *CLN2* or *SVS1* promoters (Travesa et al.,  
218 2013). First, we confirmed that the WIQ mutation reduces Whi5 binding at SBF bound DNA elements  
219 across the genome by ChIP-seq (Fig. 5C & S7A). Next, we analyzed single cells expressing  
220 Whi5(WIQ)-mCitrine, which revealed Whi5(WIQ)-mCitrine has a significantly lower bud-to-mother  
221 concentration ratio at division than wild-type Whi5. This supports our model that partitioning by amount  
222 is indeed mediated by chromatin binding (Fig. 5A). Crucially, Whi5(WIQ) amounts at birth are higher  
223 in larger cells and lower in smaller cells when compared to wild-type Whi5, demonstrating that when  
224 chromatin-binding based partitioning of Whi5 is disrupted, its sub-scaling in G1 is also disrupted (Fig.  
225 5E). Thus, our data support a model where Whi5 binding to chromatin results in its volume-  
226 independent partitioning into the mother and bud at division to ensure daughter cells inherit  
227 approximately the same amount of Whi5 regardless of their size.

228

### 229 **G1 size control requires Whi5 sub-scaling**

230 After establishing that Whi5 expression relies on a combination of sub-scaling transcription  
231 and chromatin-based partitioning, we proceeded to disable both mechanisms to test the function of  
232 Whi5 sub-scaling in G1 size control by generating cells with constant Whi5 concentrations (Fig. 6). We  
233 used the *bck2Δ* background because *BCK2* and *WHI5* may be involved in parallel size control  
234 pathways (Schmoller et al., 2015) and we are here focusing on the *BCK2*-independent branch of G1  
235 size control. We have also focused our analysis specifically on daughter cells growing in a poor non-  
236 fermentable carbon source (1% ethanol + 2% glycerol) because under these conditions G1 size control  
237 is most pronounced, in part due to the smaller and more variable size of new born daughters.

238           The memory of Whi5 partitioning throughout G1 phase relies on it being a stable protein. We  
239 therefore destabilized Whi5 by fusing Whi5-mCitrine with the Cln2 PEST degron sequence (Mateus  
240 and Avery, 2000). This allowed us to bypass size-independent partitioning because any Whi5 inherited  
241 from the previous cell cycle should then be degraded during early G1. We then expressed the Whi5-  
242 mCitrine-PEST fusion from a synthetic TET promoter that is conditionally activated by  
243 anhydrotetracycline in a dose-dependent manner, and whose expression scales with cell size like  
244 most genes (Azizoğlu et al., 2020). We grew cells in 7.5 ng/ml anhydrotetracycline because at this  
245 concentration the average cell size was similar to that of *bck2Δ* cells expressing *WHI5-mCitrine*  
246 expressed from its own promoter (*WHI5pr-WHI5-mCitrine*) (Fig. 6A). Thus, the *TETpr-WHI5-mCitrine-*  
247 *PEST* strain allows us to generate G1 cells where Whi5 amounts should no longer sub-scale with size.  
248 Instead, Whi5 concentrations in new-born daughter cells start high due to the asymmetrically  
249 partitioning, but it is then degraded in the first ~40 minutes of G1 after which a steady-state Whi5  
250 concentration is established (Fig. 6B-C). This is in contrast to *WHI5-mCitrine* expressed from its own  
251 promoter, which is steadily diluted as cells grow during G1 (Fig. 6B).

252           When we examined size control in *WHI5pr-WHI5-mCitrine* cells, a clear anticorrelation  
253 between cell volume at birth and volume growth in G1 was observed, as expected (Figs. 6D & S8A).  
254 In contrast, this anticorrelation between cell volume at birth and volume growth in G1 was significantly  
255 weaker in *TETpr-WHI5-mCitrine-PEST* cells, showing that Whi5 sub-scaling and dilution is important  
256 for cell size control in G1 (Figs. 6D & S8B). We did not observe any significant perturbation to the  
257 relationship between size at budding and growth during S/G2/M (Fig. 6E). As previously reported, for  
258 wild-type cells the two independent phases of G1 and S/G2/M combine to form an apparent adder,  
259 where an approximately fixed absolute amount of volume growth occurs during each entire cell cycle  
260 (Chandler-Brown et al., 2017). In contrast, *TETpr-WHI5-mCitrine-PEST* cells display a positive  
261 correlation between size at birth and total cell cycle volume growth (Fig. 6F).

262           The fact that the anticorrelation between birth size and G1 growth is not completely lost but  
263 only reduced (Figs. 6D & S8A-C) is consistent with the notion that other pathways feed into the G1/S  
264 transition to couple growth and cell cycle entry (Chen et al., 2020). Nevertheless, our data clearly  
265 indicates that Whi5 dilution and sub-scaling contribute significantly to G1 cell size control in budding  
266 yeast.

267

## 268 **Discussion**

269           In conclusion, while most proteins are synthesized proportionally to cell size, a handful are not  
270 and instead sub-scale with cell size (Fig. 1A&B). Such sub-scaling is already apparent in the mRNA  
271 amounts for both histones and *WHI5* across the cell cycle. Our *WHI5* promoter-swap experiments  
272 indicate that specific promoter elements are at least partly responsible for sub-scaling synthesis. In  
273 addition to this transcriptional control of synthesis, sub-scaling proteins also need a dedicated



274 mechanism to ensure that equal protein amounts are inherited by differently sized cells during cell  
275 division. We discovered that Whi5 uses chromatin-binding as a mechanism to segregate  
276 approximately equal numbers of molecules to each new-born cell and thereby ensure protein  
277 synthesized in the preceding cell cycle is inherited by new-born cells independently of their size (Fig.  
278 7).

279

### 280 **Histone genes dominate the sub-scaling gene class**

281 Through a combination of multiple transcriptomic and proteomic screens we identified histones  
282 as the major class of sub-scaling genes in addition to *WHI5*. Sub-scaling of histone synthesis  
283 maintains a stoichiometric relationship between the amount of histones and the genome without  
284 engaging wasteful feedback mechanisms, which are known to operate when histone expression is  
285 artificially perturbed (Cross and Smith, 1988; Gunjan and Verreault, 2003; Moran et al., 1990; Norris  
286 and Osley, 1987). In this way, the amount of histone synthesis in each cell cycle better reflects the  
287 binary increase in genome content rather than variations in cell size. We speculate that this helps  
288 prevent unwanted variations in chromatin structure or accessibility in different sized cells.

289

### 290 **Whi5 sub-scaling is one of multiple inputs for G1 size control**

291 In the case of *WHI5*, the function of sub-scaling synthesis is to control cell size. Whi5 functions  
292 in early G1 of the cell cycle to inhibit the SBF transcription factor and thereby delay cell cycle  
293 progression (Costanzo et al., 2004; de Bruin et al., 2004). Whi5 is inactivated by phosphorylation by  
294 cyclin-Cdk complexes that also drive its exclusion from the nucleus at *Start*, the point of commitment  
295 to cell division (Doncic et al., 2011). Importantly, the exclusion of Whi5 from the nucleus at *Start* marks  
296 the end of the most size-dependent part of the cell division cycle (Di Talia et al., 2007).

297 The sub-scaling of Whi5 allows its concentration to reflect and control cell size. That all cells  
298 are born with similar amounts of Whi5 protein, which is then diluted in G1, means that the Whi5  
299 concentration is a readout of current cell size. Since Whi5 is a cell cycle inhibitor, its higher  
300 concentration in smaller cells delays their *Start* transition so that they have more time to grow in G1.  
301 Conversely, larger cells have lower concentrations of Whi5 and therefore more rapidly enter the cell  
302 division cycle. This importance of Whi5 sub-scaling for cell size control in G1 is demonstrated by our  
303 experiments where we synthetically disable Whi5 sub-scaling and observe a weakened G1 size control  
304 (Fig. 6). Crucially, to remove Whi5 sub-scaling, we had to bypass *both* the sub-scaling transcription  
305 and the chromatin-based partitioning mechanisms. Our data indicate that while Whi5 sub-scaling and  
306 dilution contribute significantly to budding yeast G1 cell size control, they do not remove it completely.  
307 This is consistent with the presence of additional size control mechanisms (Chen et al., 2020). We  
308 note that the experiments we present here are related to, but differ from a previous examination of the  
309 effect of *GAL1pr-WHI5* expression utilizing a stable Whi5 protein in a *BCK2+* background where the

310 chromatin-based partitioning of Whi5 has not been removed (Barber et al., 2020). Taken together,  
311 theirs and our results are consistent with both the transcriptional and partitioning mechanism being  
312 key to Whi5's role as one of multiple inputs into G1 size control.

313 In addition to Whi5, there are several other key regulators of *Start*, including the SBF  
314 transcription factor, that could contribute to the size-dependence of G1 (Andrews and Herskowitz,  
315 1989; Eser et al., 2011; Ferrezuelo et al., 2010; Koch et al., 1993; Nasmyth and Dirick, 1991). Crucially,  
316 SBF regulates the transcriptional activation of G1 cyclins that complete the positive feedback loop  
317 defining *Start* as the commitment point to enter the cell cycle (Doncic et al., 2011; Skotheim et al.,  
318 2008). SBF was previously identified as a key regulator of super-scaling gene expression in a study  
319 examining gene expression in cells of different size in G1 phase (Chen et al., 2020). However, in this  
320 data, Whi5 was diluted in the larger G1 cells so that it was possible to interpret the SBF super-scaling  
321 to be due to the size-dependent Whi5 dynamics. Interestingly, we found here that the transcription of  
322 a number of SBF targets, including the G1 cyclin *CLN2*, super-scales throughout the cell cycle. This  
323 is unlikely to be a downstream effect of Whi5 sub-scaling because by this stage in the cell cycle Whi5  
324 has been phosphorylated, inactivated, and exported from the nucleus. Thus, it appears likely that  
325 Whi5 is not the only size-dependent signal regulating SBF activated transcription. We find it intriguing  
326 that both the super-scaling and sub-scaling genes we identified here are predominantly cell cycle  
327 regulated transcripts whose expression peaks outside of G1.

328

### 329 **The role of Whi5 dilution in G1**

330 It is important to note that our Whi5 dilution model does not propose to explain exactly why  
331 any given cell enters the cell cycle precisely when it does. Instead it addresses the question of how  
332 cells measure their size and then input this information, alongside other size-independent inputs, into  
333 the decision to divide. Importantly, the relationship between size at birth and G1 duration exhibits  
334 significant cell-to-cell variability (Di Talia et al., 2007). Our model is therefore not that cells progress  
335 through *Start* at a precise Whi5 concentration threshold. Rather, our model is that the stochastic rate  
336 of progression through *Start* is modulated by the size-dependent Whi5 concentration, as well as  
337 additional cell size-dependent and cell size-independent mechanisms. Moreover, we support the  
338 recent conclusion that the relative importance of Whi5 sub-scaling and dilution will vary significantly in  
339 different growth conditions (Qu et al., 2019). For instance, G1 is longer and cell size control is more  
340 pronounced in daughter cells born in poorer carbon sources (*e.g.*, non-fermentable carbons such as  
341 ethanol and glycerol) compared to those born in richer carbon sources (*e.g.*, glucose). It is also under  
342 poorer carbon sources that Whi5 concentrations are highest (Qu et al., 2019). Thus, daughter cells  
343 born in rich carbon conditions will have lower Whi5 concentrations combined with a shorter G1 which  
344 results in less Whi5 dilution simply because the extent of dilution is determined by the amount of  
345 volume growth in G1. Consistent with this picture, it is precisely in these rich conditions that size

346 control, measured as the degree of inverse correlation between G1 duration and cell size at birth, is  
347 weakest (Di Talia et al., 2007).

348

349 **Chromatin binding provides an elegant mechanism for equal protein segregation independent**  
350 **of daughter cell size**

351 When examining the inheritance of Whi5 protein levels during cell division we discovered that  
352 the inherent asymmetry at cytokinesis poses a problem for sub-scaling proteins. If a protein were  
353 simply partitioned in proportion to the relative volumes of newborn cells, sub-scaling would be lost.  
354 Instead, we found cells use chromatin-binding to harness the faithful segregation of sister  
355 chromosomes to partition approximately equal protein amounts to newborn cells regardless of their  
356 size (Fig. 7). This partitioning mechanism is especially relevant when there is a major size asymmetry  
357 at cytokinesis as is the case for budding yeast, but also in some metazoan cell divisions including *D.*  
358 *melanogaster* neuroblasts and *C. elegans* cells in the early embryo (Chia et al., 2008; Sulston et al.,  
359 1983). Thus, while it has long been appreciated that big and small cells both have the same amount  
360 of DNA, here we identified a set of genes that are similarly sub-scaling. It is both curious and elegant  
361 that the sub-scaling gene set includes *WHI5*, which regulates DNA replication, while the DNA itself is  
362 used as a scaffold for the synthesis and maintenance of sub-scaling protein concentrations.

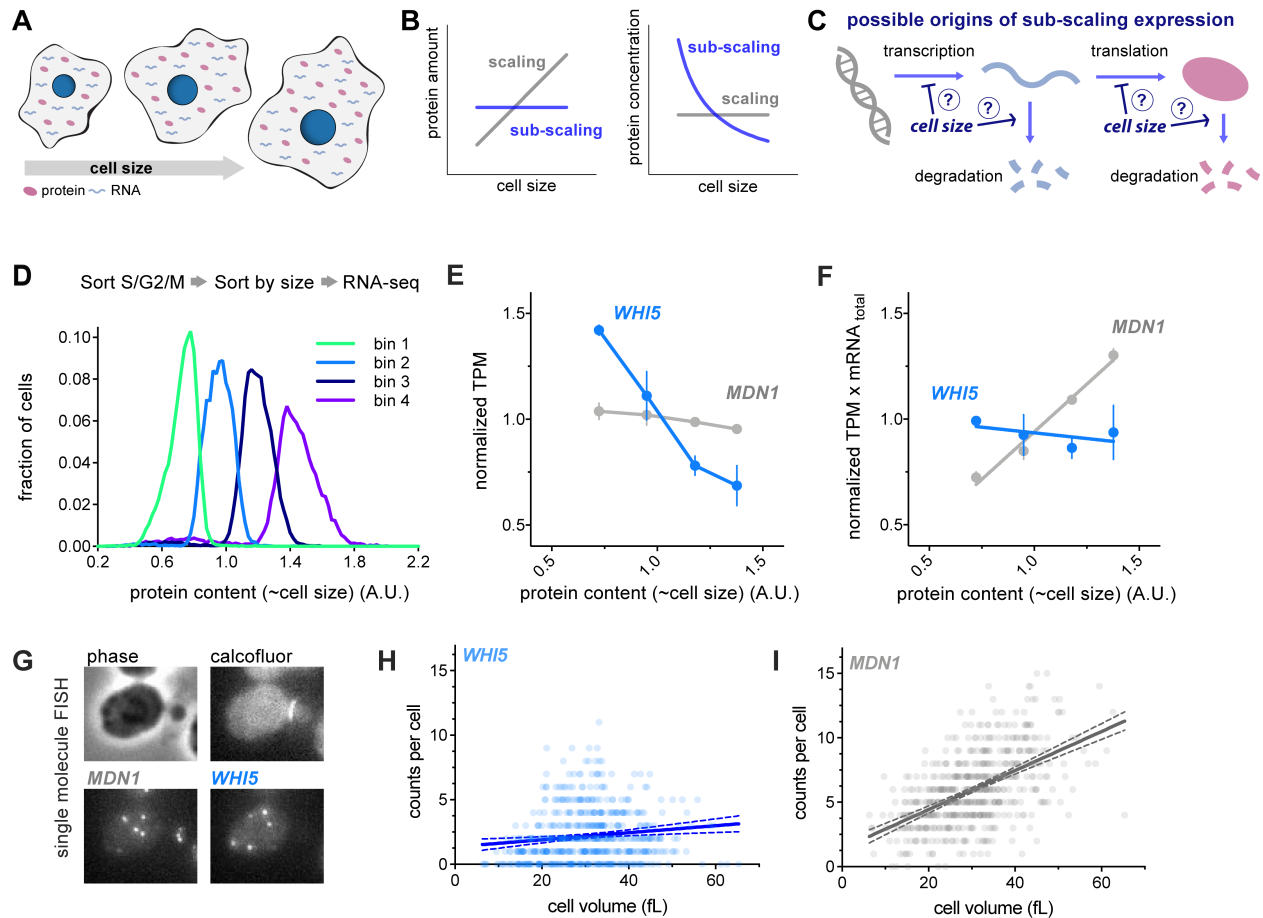

363

364 **Figure 1 | *WHI5* mRNA does not scale with cell size**

365 (A-C) Schematics illustrating scaling and sub-scaling gene expression. (A) Total protein and RNA copy  
 366 numbers per cell generally scale with to cell volume so that concentrations remain constant during  
 367 growth. (B) However, some proteins sub-scale with size such that protein amounts are constant as a  
 368 function of size and therefore protein concentrations decrease with cell size, which (C) could result  
 369 from regulation at any step of gene expression.

370 (D-F) Cells in S/G2/M were sorted into four bins based on the intensity of total protein dye. See Fig.  
 371 S1 and Materials and Methods for details. (D) Histogram of total protein content per cell in each bin  
 372 remeasured after sorting. (E) Normalized Transcripts Per Million (TPM / mean TPM) for *WHI5* and  
 373 *MDN1* mRNA in cells of different sizes (total protein content). The mean ( $\pm$ range) of two biological  
 374 replicates is plotted. Changes in TPM are proportional to changes in mRNA concentration. (F)  
 375 Normalized TPM x total-mRNA for *WHI5* and *MDN1* mRNA in cells of different sizes (total protein  
 376 content). Mean ( $\pm$ range) of two biological replicates is plotted. Changes in TPM x total mRNA are  
 377 proportional to changes in mRNA amount. Relative total mRNA per cell was determined by the number  
 378 of reads relative to those from a fixed number of *S. pombe* cells added to the sample.

379 (G-I) single-molecule Fluorescence In Situ Hybridization (smFISH) analysis of *WHI5* and *MDN1*  
 380 mRNA. (G) representative smFISH images. (H&I) mRNA counts per cell as a function of cell volume  
 381 for *WHI5* and *MDN1* determined by smFISH, n=567 cells. Linear regression (solid line) and 95%

382 confidence interval (dashed lines) are shown. Data are pooled from two biological replicates. The  
383 same data with replicates plotted independently are shown in Fig. S3A&B.

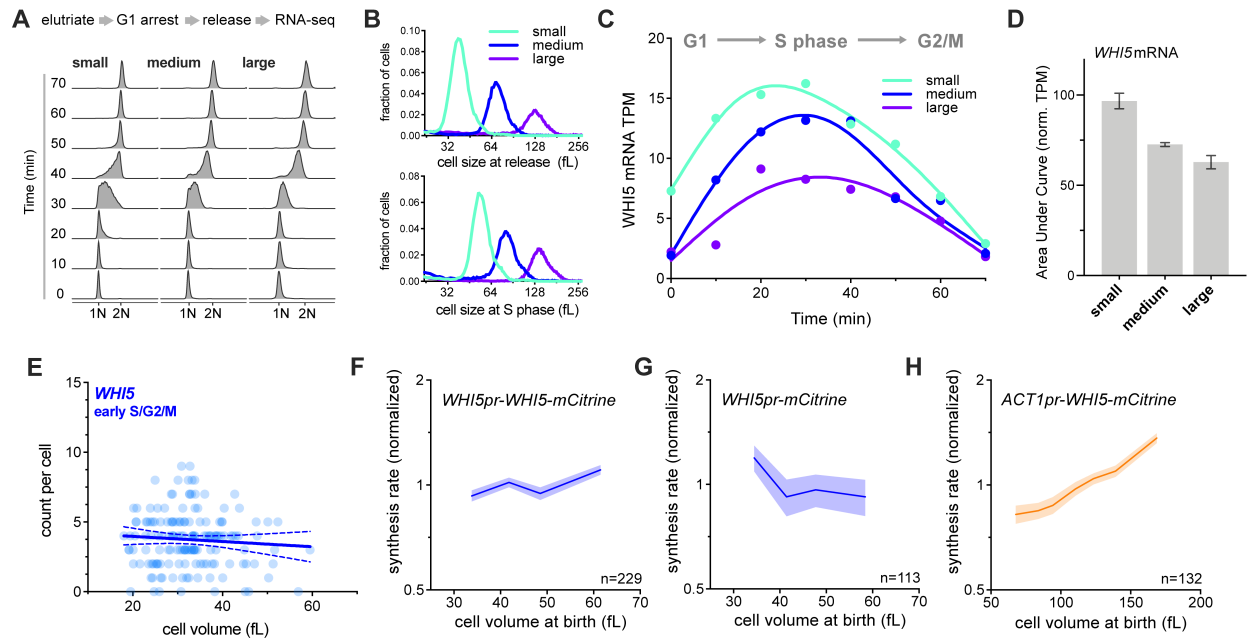

384

385

386 **Figure 2 | *WHI5* sub-scaling occurs across the cell cycle and is encoded in the *WHI5* promoter**

387 (A-D) G1 cells of different sizes (small, medium, and large) were arrested for increasing amounts of

388 time in G1 using a temperature sensitive *cdc28-13* allele at 37°C. Cells were then released from G1

389 to progress synchronously through a full cell cycle and analyzed by RNA-seq. See Fig. S2 for details.

390 (A) DNA content analysis determined by flow cytometry. (B) Size distributions at point of release from

391 G1 arrest (top panel) and at mid S-phase (bottom panel, corresponds to the 40-minute time point). (C)

392 *WHI5* mRNA TPM and (D) the AreA Under the Curve (AUC) of mean normalized *WHI5* mRNA TPM

393 for small, medium large cells synchronously progressing through the cell cycle. The AUC mean ( $\pm$

394 range) of two biological replicates is plotted.

395 (E) mRNA counts per cell for *WHI5* as a function of cell size in early S/G2/M cells determined by

396 smFISH;  $n=156$  cells. Early S/G2/M cells were defined as budded cells with a small ( $\leq 0.2$ ) bud-to-

397 mother volume ratio. Linear regression (solid line) and 95% confidence interval (dashed lines) are

398 shown. Data are pooled from two biological replicates. The same data with replicates plotted

399 independently, including data for *MDN1*, are shown in Fig. S3E&F.

400 (F-H) Protein synthesis rates normalized to the mean as a function of cell volume at budding were

401 determined by time-lapse fluorescence microscopy measuring Whi5-mCitrine expressed from (F) the

402 endogenous *WHI5* promoter or (H) the *ACT1* promoter, and (G) mCitrine expressed alone from the

403 *WHI5* promoter. Synthesis rates were determined as in Schmoller et al., 2015 for single cells using

404 linear fits of total protein traces for the period between bud emergence and cytokinesis (S/G2/M). Data

405 are binned according to cell volume at budding and the mean ( $\pm$ SEM) of each bin is plotted. Un-binned

406 single-cell values from the same data are plotted in Fig. S3G-I.

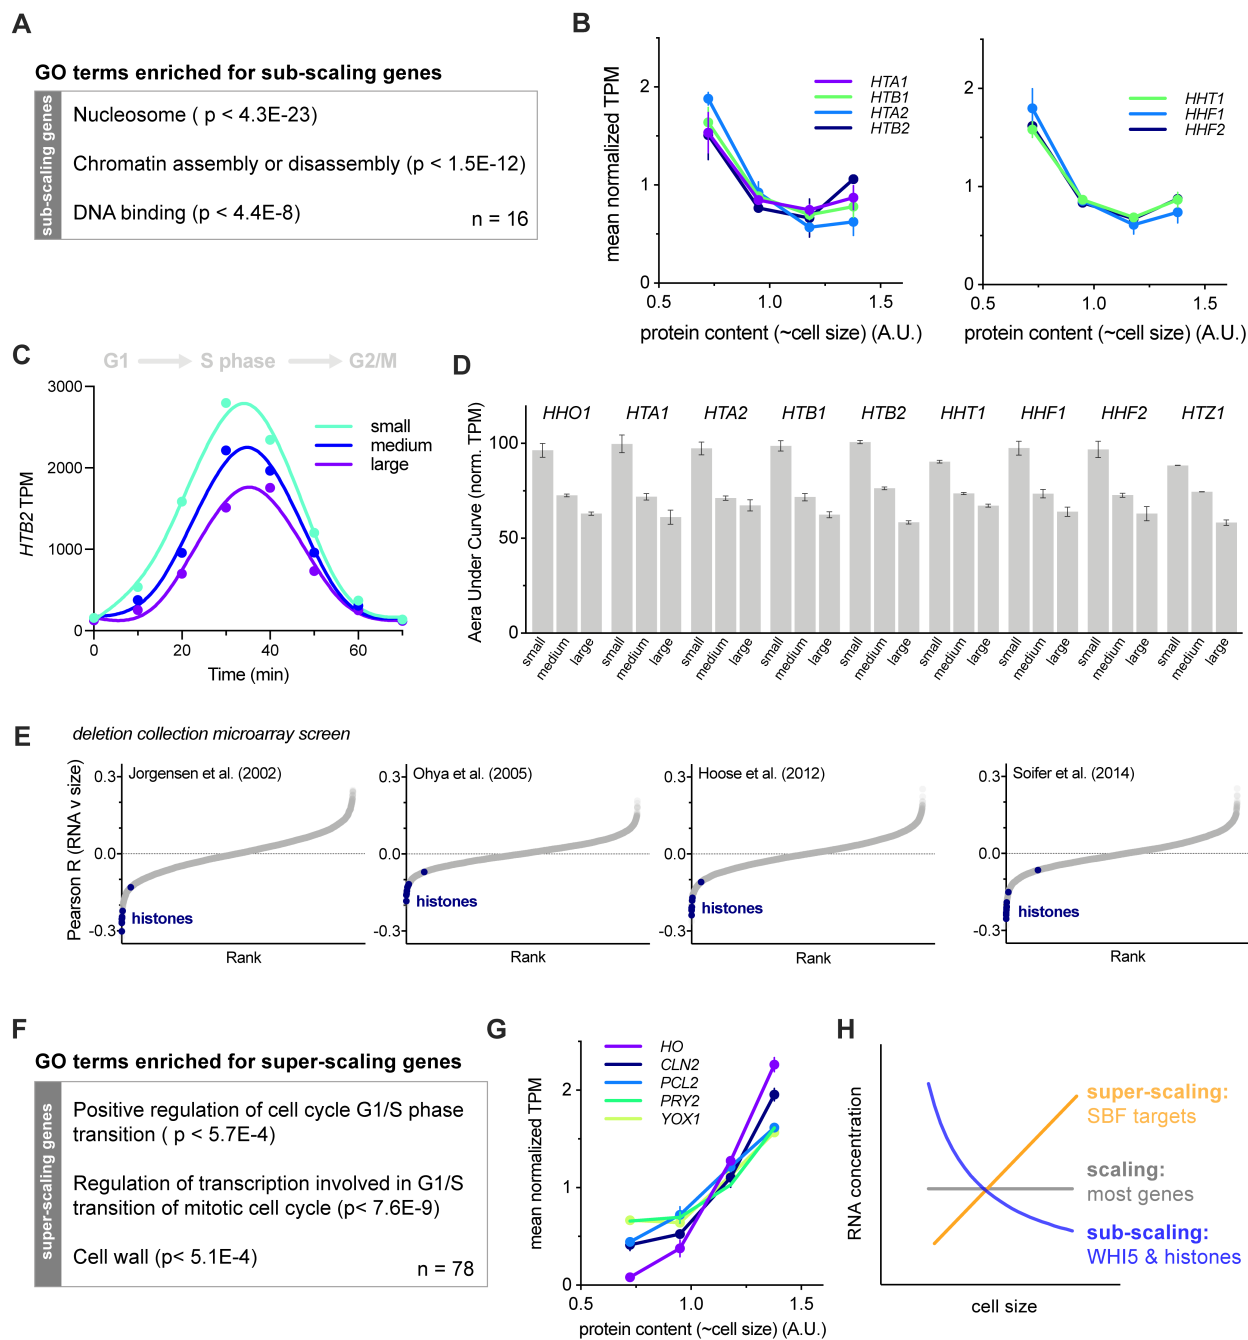

407

408

409

### Figure 3 | Histones are a rare class of sub-scaling genes

410 (A) Gene ontology terms enriched in sub-scaling genes. 9 of the 16 sub-scaling genes encode histones  
 411 and one is *WHI5*. See Fig. S4A and Materials and Methods for classification details.

412 (B) Normalized TPM (TPM / mean TPM) for sub-scaling histone mRNAs in cells of different sizes (total  
 413 protein content). The mean ( $\pm$ range) of two biological replicates is plotted. Changes in TPM are  
 414 proportional to changes in mRNA concentration. See Fig. S1 for experimental details.

415 (C) *HTB2* mRNA TPM for small, medium, and large cells synchronously progressing through the cell  
 416 cycle as in Fig.2C&D. See Fig. S2 for experimental details.

- 417 (D) The Area Under the Curve (AUC) of mean normalized sub-scaling histone mRNA TPM of small,  
418 medium, and large cells synchronously progressing through the cell cycle. The AUC mean ( $\pm$ range)  
419 of two biological replicates is plotted.
- 420 (E) Pearson correlation coefficient, R for the correlation between Histone mRNA levels, relative to  
421 wild-type, in 1,484 gene deletion strains (Kemmeren et al., 2014; O'Duibhir et al., 2014) and the cell  
422 size of the respective gene deletions for four different data sets of size measurements (Hoose et al.,  
423 2012; Jorgensen et al., 2002; Ohya et al., 2005; Soifer and Barkai, 2014). Each point represents an  
424 individual transcript. Histone mRNAs are shown in blue. The individual regression fits for the histone  
425 transcript levels with cell size determined by Jorgensen et al. are shown in Fig. S4D.
- 426 (F) Gene ontology terms enriched in super-scaling genes. See Fig. S6A and Materials and Methods  
427 for classification details.
- 428 (G) Normalized TPM (TPM / mean TPM) for example super-scaling mRNAs, specifically those known  
429 as targets of the SBF transcription factor, in cells of different sizes (total protein content). The mean  
430 ( $\pm$ range) of two biological replicates is plotted. Changes in TPM are proportional to changes in mRNA  
431 concentration. See Fig. S1 for experimental details.
- 432 (H) schematics illustrating the scaling, sub-scaling and super-scaling trends of gene expression,  
433 representative of most genes, WHI5 and histones, and a subset of SBF targets respectively.



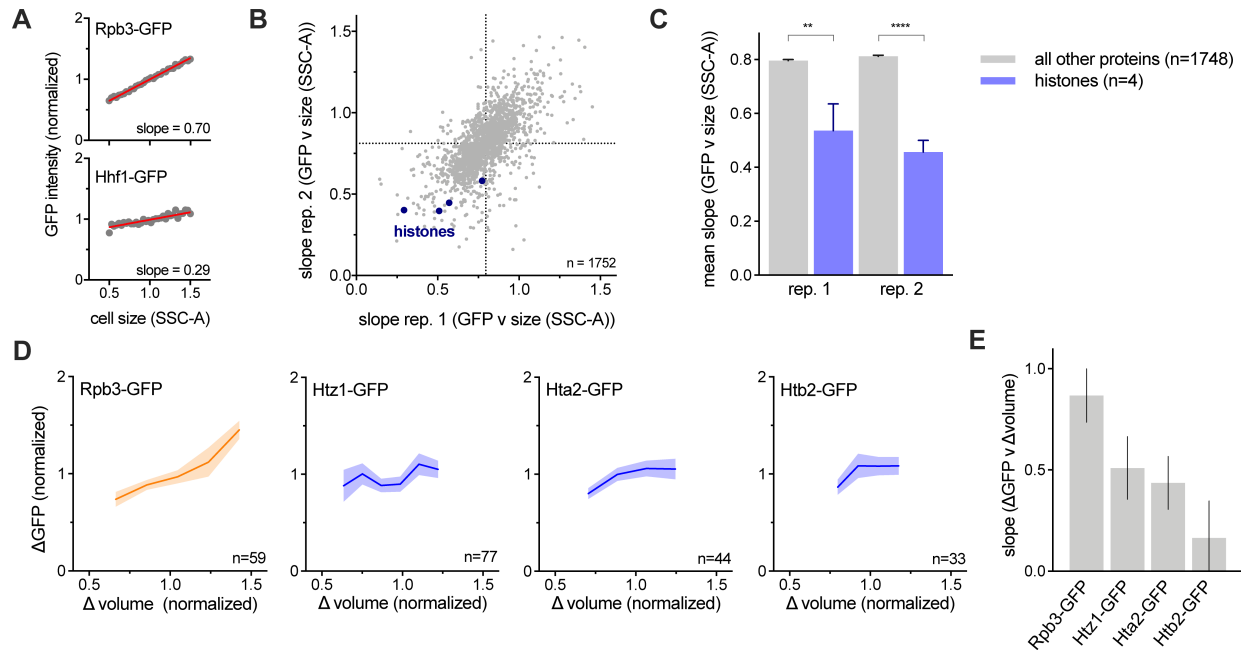

434

435

436 **Figure 4 | Histone protein synthesis does not scale with cell size**

437 (A-C) Analysis of size-dependent expression in the genome-wide collection of GFP fusion strains  
 438 measured by flow-cytometry (Parts et al., 2014). Side scatter (SCC-A) was used as a proxy for cell  
 439 size. The slope of the linear fit between cell size (SCC-A) and GFP intensity in budded cells was used  
 440 to estimate the degree of size-dependence for each protein. See Materials and Methods for details.

441 (A) Plot of example protein-GFP levels (intensities normalized to the mean intensity) against cell size  
 442 (SCC-A normalized to the mean SCC-A) in budded cells. Grey dots denote bin means. Red lines show  
 443 the linear regression to the un-binned data.

444 (B) Slope values (for the linear regression between GFP and cell size in budded cells) of 1752 proteins  
 445 analyzed in two replicates. Slopes closer to 0 correspond to stronger sub-scaling behavior. Histone  
 446 proteins are shown in blue.

447 (C) Average slope values (for the linear regression between GFP and cell size in budded cells) for  
 448 histones (blue) and all other proteins (grey). Four histone proteins were present in the 1752 proteins  
 449 analyzed. Histone proteins have significantly smaller slopes than the average protein (\*\*  $p=0.0014$ ;  
 450 \*\*\*\*  $p < 0.0001$ ).

451 (D) The amount of Rpb3-GFP (RNA polymerase II subunit) and three histones (Hta2-GFP, Htb2-GFP  
 452 and Htz1-GFP) synthesized ( $\Delta$ GFP normalized to its mean) between birth and division as a function  
 453 of the amount of growth ( $\Delta$ volume normalized to its mean), determined by single cell time-lapse  
 454 fluorescence microscopy. Data are binned according to  $\Delta$ volume and the bin means ( $\pm$ SEM) are  
 455 plotted.

456 (E) Slope of the linear fits to single cell values of  $\Delta$ GFP against  $\Delta$ volume. Error bars show the standard  
 457 error of the slope.

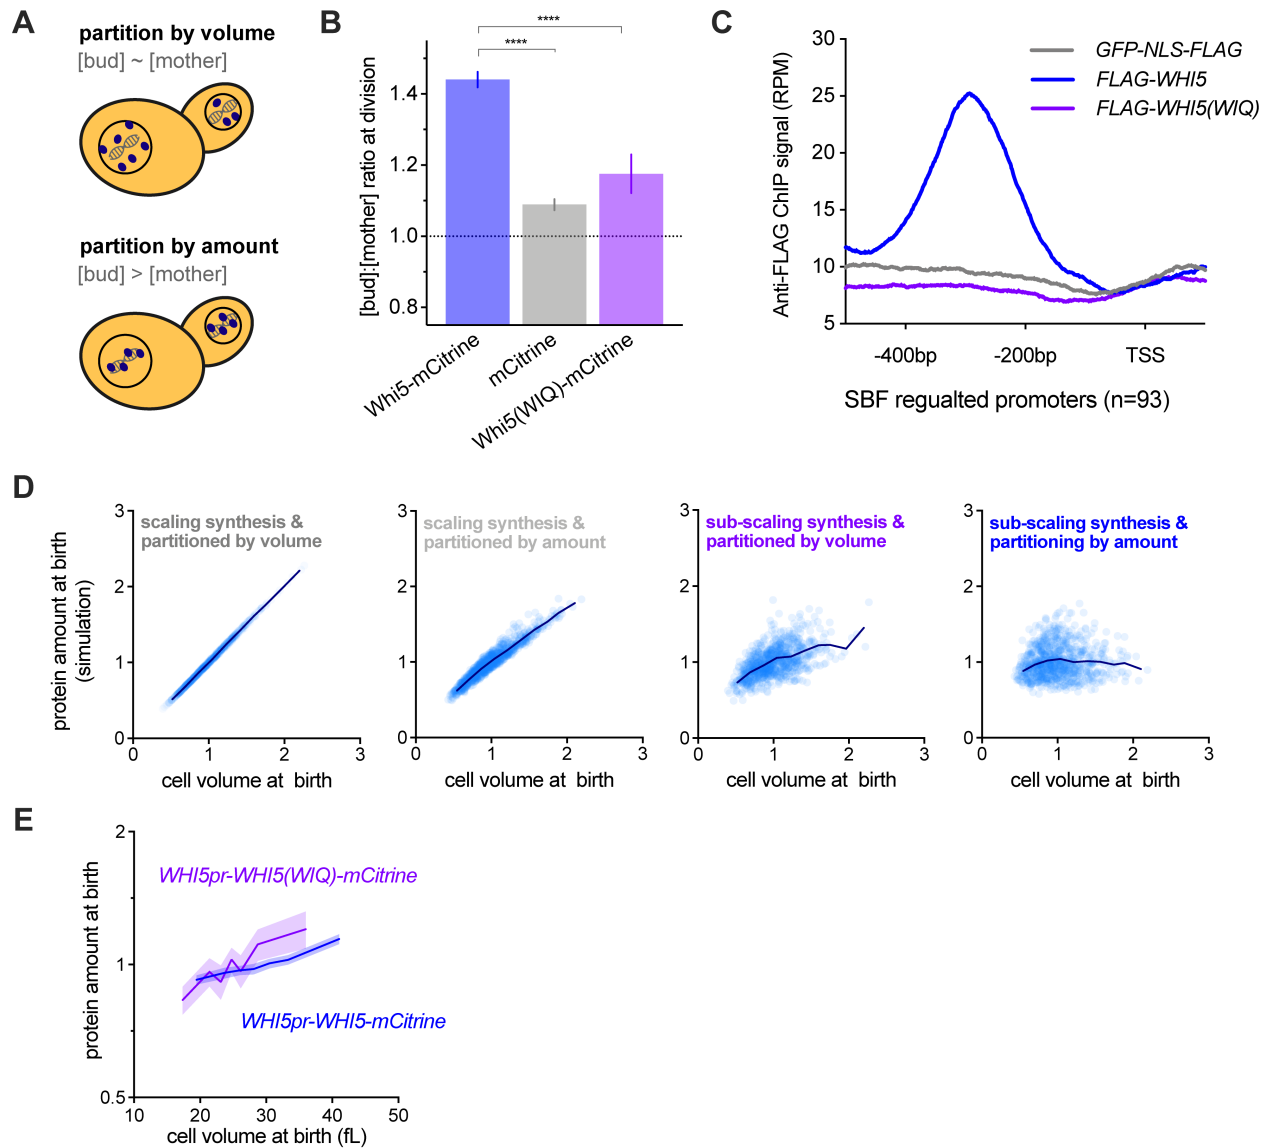

458

459

460 **Figure 5 | Maintenance of Whi5 sub-scaling requires chromatin-based partitioning during**  
 461 **asymmetric division**

462 (A) Schematic illustrating the different regimes of protein partitioning at cell division which can be  
 463 quantified by comparing the mother-to-bud protein concentration ratio at cytokinesis. A ratio ~ 1 is  
 464 expected for proteins that are partitioned in proportion to volume. A ratio > 1 is expected for proteins  
 465 that are partitioned in equal protein amounts (*i.e.*, independent of the mother and bud volume)

466 (B) The bud-to-mother concentration ratios for Whi5-mCitrine, free mCitrine, and Whi5(WIQ)-mCitrine  
 467 at cytokinesis. Whi5(WIQ)-mCitrine has reduced recruitment to DNA because it does not bind the SBF  
 468 transcription factor (Travesa et al., 2013) (Fig. 5C & S7A). \*\*\*\* p < 0.0001.

469 (C) anti-Flag ChIP-seq experiments were performed to compare Whi5, Whi5(WIQ) and a GFP-NLS  
 470 ChIP control. Average RPM metagene plot upstream of all SBF regulated promoters (as defined by

471 (Ferrezuelo et al., 2010)) is shown. ChIP signal around individual SBF binding sites, including  
472 additional replicates and controls, is shown in Fig S7A.

473 (D) Simulation protein amounts at birth as a function of daughter volume at birth. Four different  
474 conditions were simulated where protein expression was either in proportion to cell size (scaling) or  
475 independent of cell size (sub-scaling), and protein partitioning is either by amount or in proportion to  
476 cell volume. Individual simulated cells (light blue) as well as bin means (dark blue) are plotted. Protein  
477 concentrations from the same simulation are shown in Fig. S7B.

478 (E) Protein amount at birth (normalized to the mean) as a function of cell volume at birth for *WHI5pr-*  
479 *WHI5-mCitrine* and *WHI5pr-WHI5(WIQ)-mCitrine* cells. Data are binned according to cell size at birth  
480 and the bin means ( $\pm$ SEM) are plotted. Un-binned single-cell values of the same data are plotted in  
481 Fig. S7D.

482

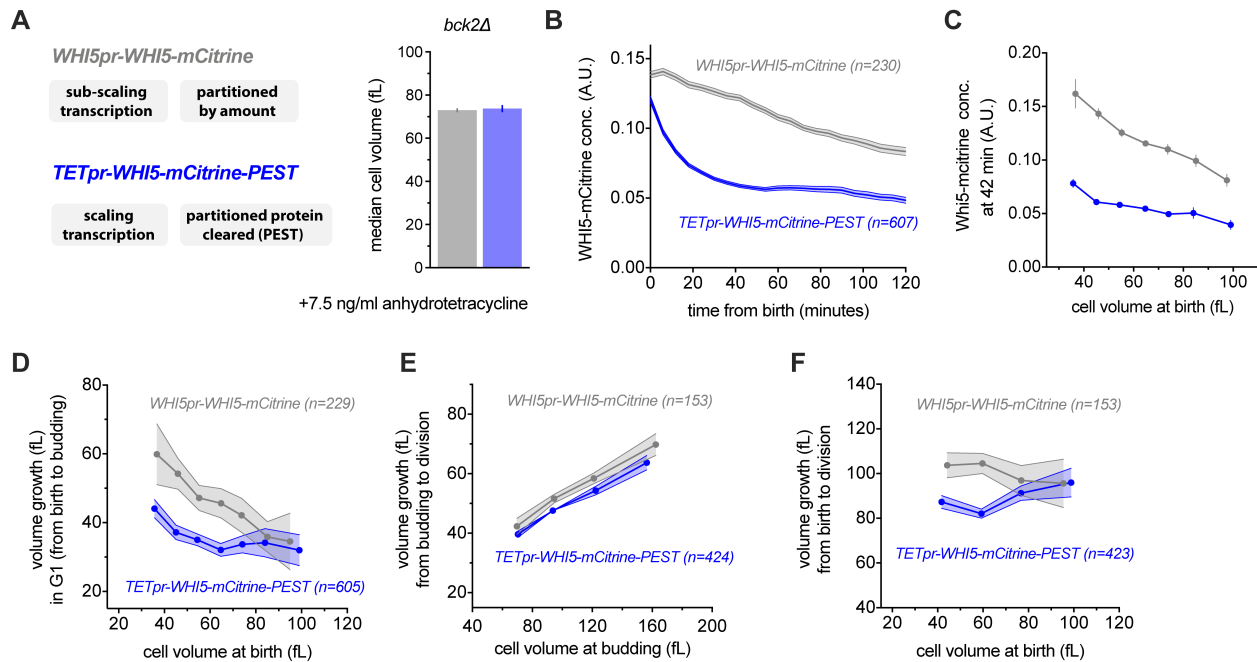

483

484

### 485 **Figure 6 | Disruption of Whi5 sub-scaling compromises G1 size control**

486 (A) Median cell volume (average of two independent measurements), measured by Coulter counter of  
 487 cells expressing *WHI5pr-WHI5-mCitrine* (grey) or *TETpr-WHI5-mCitrine-PEST* (blue) in the presence  
 488 of 7.5ng/ml anhydrotetracycline to induce expression from the size-scaling *TET* promoter. The fused  
 489 *PEST* domain destabilizes Whi5 to eliminate Whi5 synthesized in the preceding cell cycle from new-  
 490 born G1 cells.

491 (B-F) Single cell time-lapse microscopy was performed on *bck2Δ* strains expressing either *WHI5pr-*  
 492 *WHI5-mCitrine* or *TETpr-WHI5-mCitrine-PEST*. D-F show binned data where no more than 2 cells do  
 493 not fit within the cell volume bin limits.

494 (B) Mean Whi5 concentration ( $\pm$ SEM) as a function of time from birth in all cells that completed G1.

495 (C) Mean Whi5 concentration ( $\pm$ SEM) at 42 minutes after birth as a function of cell volume at birth in  
 496 all cells that completed G1.

497 (D) Cell growth in G1 as a function of cell volume at birth for cells that completed G1. Data are binned  
 498 according to cell volume at birth and the bin means ( $\pm$ SEM) are plotted. Un-binned single-cell values  
 499 of the same data are plotted in Fig. S8B&C.

500 (E) Cell volume growth between budding and cell division (S/G2/M) as a function of cell volume at  
 501 budding. Data are binned according to cell volume at budding for cells that completed the cell cycle and  
 502 the bin means ( $\pm$ SEM) are plotted.

503 (F) Cell volume growth between birth and cell division as a function of cell volume at birth. Data are  
 504 binned according to cell volume at birth for cells with a completed cell cycle and the bin means ( $\pm$ SEM)  
 505 are plotted.

506

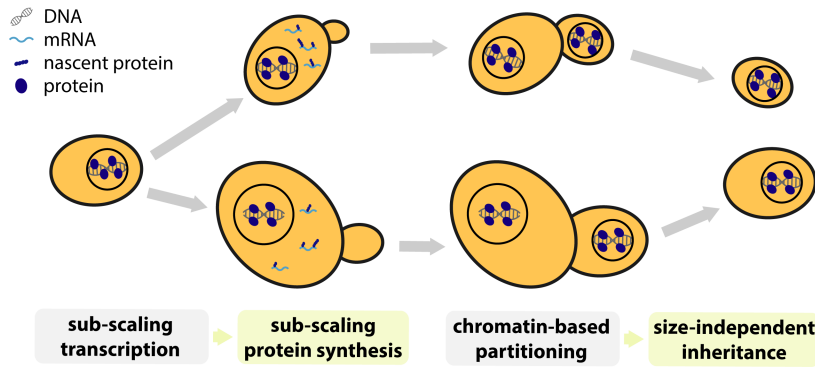

### Figure 7 | Summary schematic

A small class of genes including the cell cycle inhibitor *WHI5* and histones are transcribed in a sub-scaling manner, resulting in sub-scaling protein synthesis during the cell cycle. Sub-scaling proteins must also be partitioned during cell division independent of daughter cell size, which is achieved through chromatin-based partitioning.

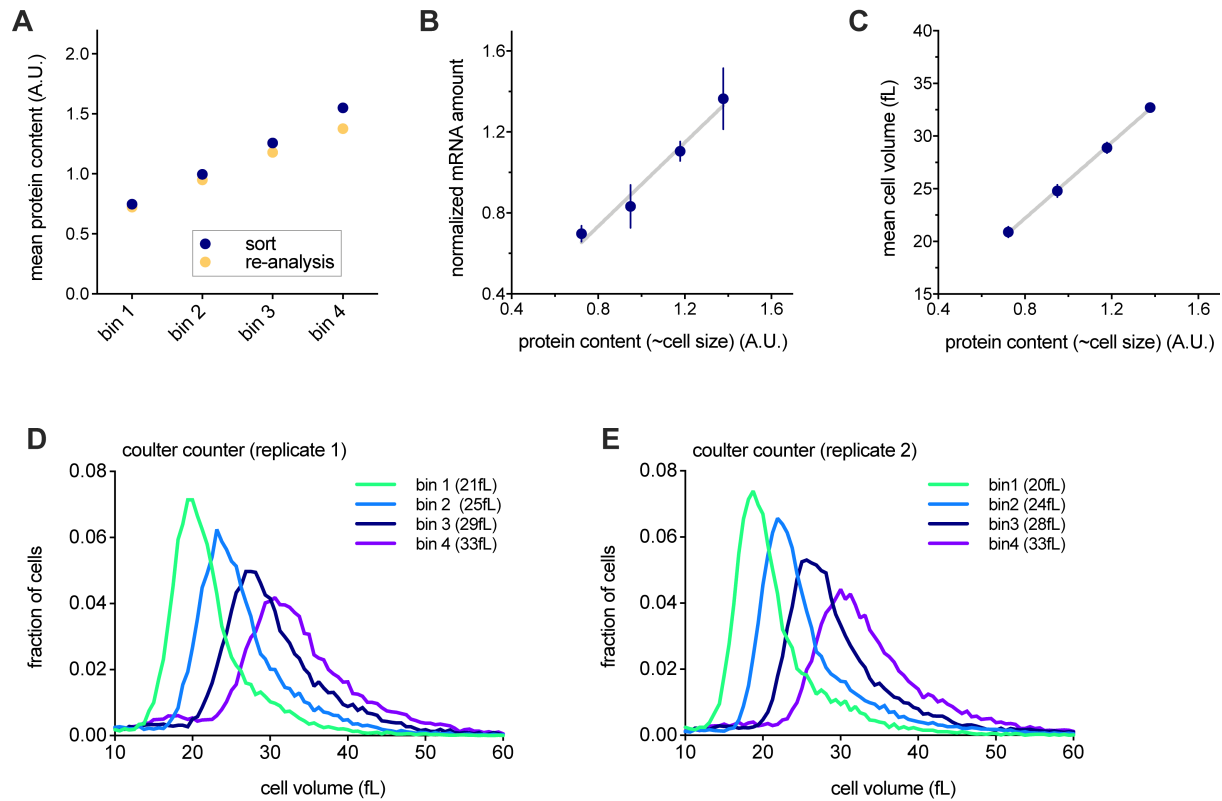

514

### 515 **Figure S1 | Transcriptomic analysis of cells sorted by cell size**

516 Related to Figures 1D-F.

517 (A-E) Cells in S/G2/M were sorted into four different bins based on the intensity of a total protein dye  
518 that we used as a proxy for cell size. See Materials and Methods for further details.

519 (A) Protein dye intensity (normalized to the mean) measured during sorting (blue) and re-measured  
520 for cells from each bin after the sort (yellow). The re-analysis (yellow) confirms high sort fidelity.

521 (B) The amount of mRNA (mean  $\pm$  SEM) per cell for each bin, determined by the number of reads  
522 relative to those from a fixed number of *S. pombe* spike-in cells added to the sample. Total protein  
523 amount is well correlated with total cellular mRNA amount.

524 (C-E) Cell volume of cells after sorting, measured by Coulter counter. Total protein amount is  
525 correlated with cell volume.

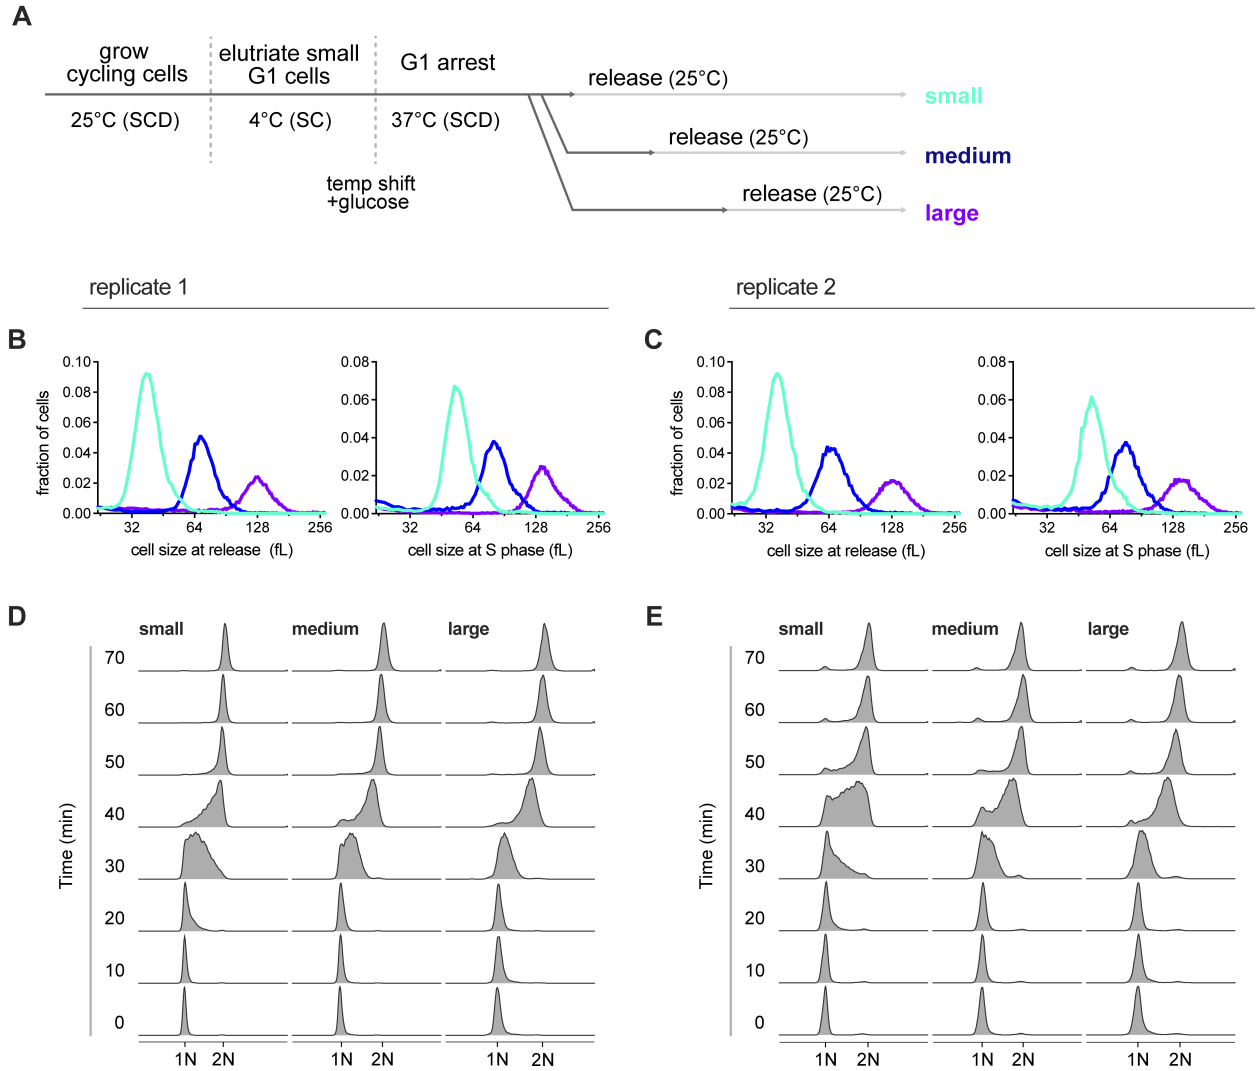

526  
527

528 **Figure S2 | Transcriptomic analysis of different sized cells synchronously progressing through**  
529 **the cell cycle**

530 Related to Figure 2.

531 (A) Schematic of experimental design. G1 cells harboring a temperature sensitive Cdk1 allele (*cdc28-*  
532 *13*) were recovered by centrifugal elutriation. Cells were then shifted to the restrictive temperature  
533 (37°C) to arrest them in G1. After increasing amounts of time during the arrest, cells reached small,  
534 medium or large cell sizes. The culture was then shifted to the permissive temperature (25°C) to allow  
535 cell cycle entry. Samples for RNA-seq were then collected every ten minutes at the eight time points  
536 corresponding to synchronous progression through the cell cycle. The 0-minute time point is  
537 designated as that 30 minutes before early S phase as determined by DNA-content analysis using  
538 flow cytometry (Fig. S2D&E). See Materials and Methods for further details.

539 (B&C) Cell size distributions, measured by Coulter counter, for small, medium, and large cells when  
540 they are released from the G1 arrest (left panel) or at mid S-phase (the 40-minute time point, right  
541 panel) for two biological replicates.

542 (D&E) DNA content analysis of small, medium, and large cells synchronously progressing through the  
543 cell cycle for two biological replicates.  
544 Data in Figures S2B&D are also presented in Figure 2A&B (Shown here for comparison with S2C&E).



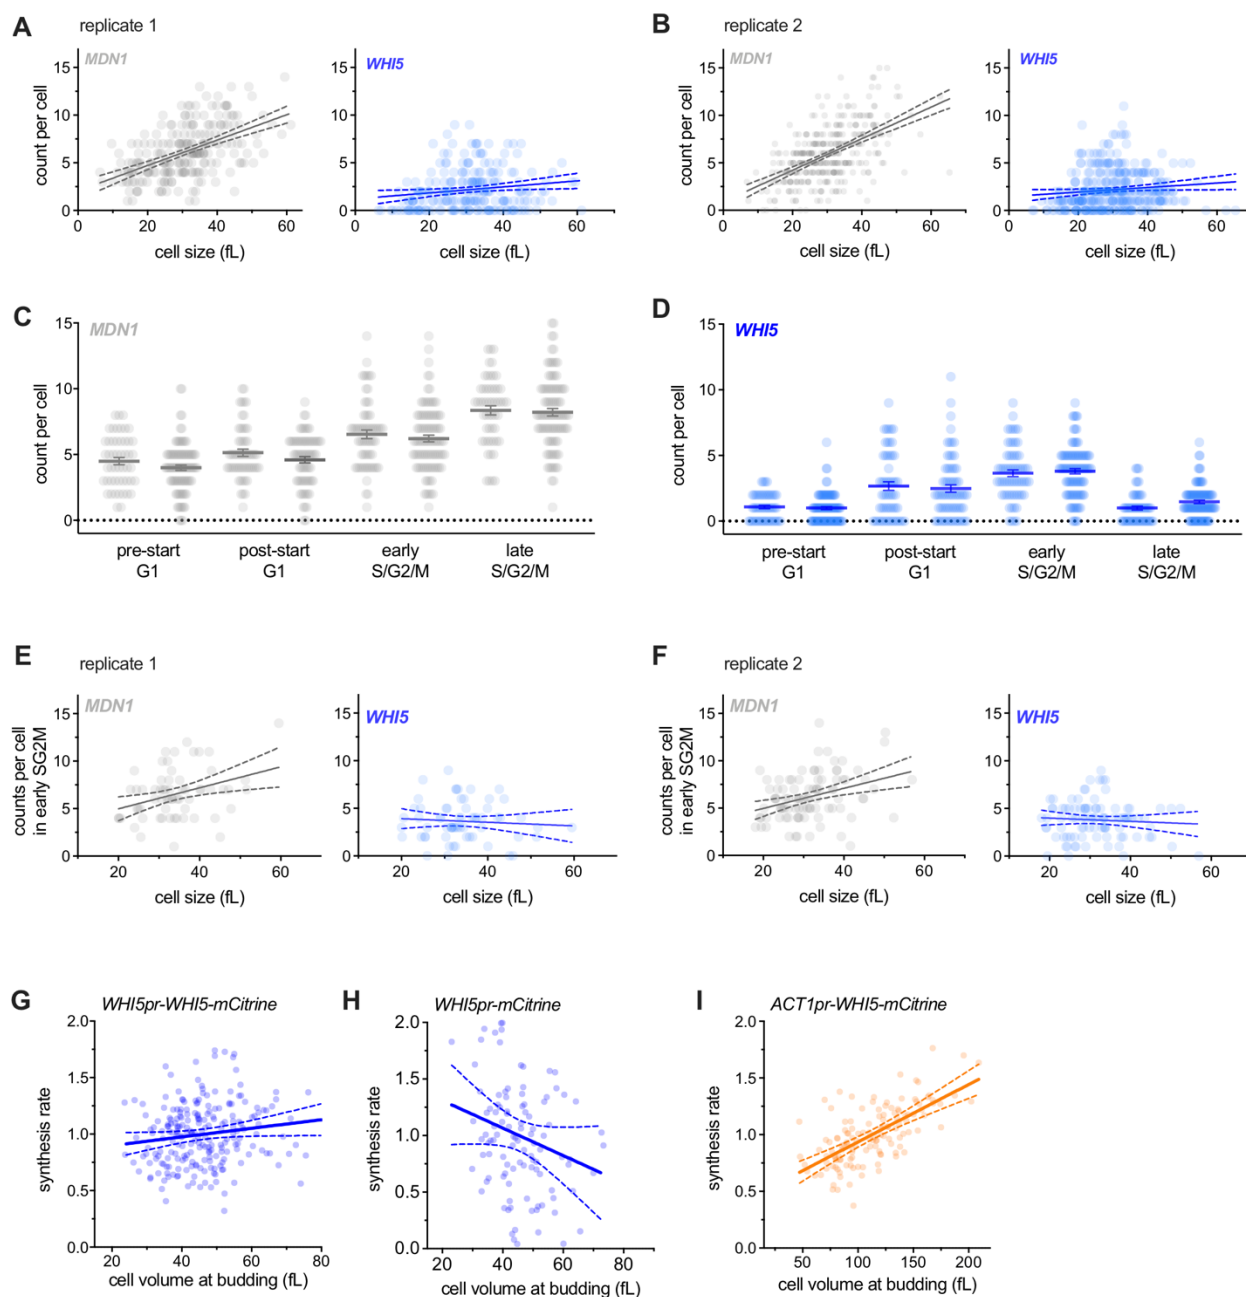

545

546

547 **Figure S3 | Single-cell analysis of *WHI5* mRNA expression**

548 Related to Figures 1G-I & 2E.

549 (A&B) mRNA counts per cell, measured by single molecule FISH, for *MDN1* or *WHI5* as a function of  
 550 cell size in two independent biological replicates. All cells of any cell cycle stage are included. Linear  
 551 regression (solid line) and 95% confidence interval (dashed lines) are shown. The same data are re-  
 552 plotted in Fig. 1 H&I with replicates pooled.

553 (C&D) mRNA counts per cell, measured by single molecule FISH, for *MDN1* or *WHI5* at different cell  
554 cycle stages in two independent biological replicates. Mean (solid line)  $\pm$  SEM (error bars) are shown.  
555 See Materials and methods for details of cell cycle stage classification.  
556 (E&F) mRNA counts per cell, measured by single molecule FISH, for *MDN1* and *WHI5* as a function  
557 of cell size during early S/G2/M in two independent biological replicates. Early S/G2/M cells were  
558 defined as budded cells with a small ( $\leq 0.2$ ) bud-to-mother volume ratio. Linear regression (solid line)  
559 and 95% confidence interval (dashed lines) are shown. The same data are re-plotted in Fig. 2E with  
560 replicates pooled.  
561 (G-I) Protein synthesis rates (normalized to the mean) as a function of cell volume at budding,  
562 measured by time-lapse microscopy for Whi5-mCitrine fusion proteins expressed from (G) the  
563 endogenous *WHI5* promoter or (I) the *ACT1* promoter and (H) mCitrine expressed alone from the  
564 *WHI5* promoter. Synthesis rates were determined for single cells for the period between bud  
565 emergence and cytokinesis using a linear fit as in (Schmoller et al., 2015). Linear regression (solid  
566 line) and 95% confidence interval (dashed lines) are shown. (G) n=229, 2 data points outside the axis  
567 limits. (I) n=113, 4 data points outside the axis limits. (H) n=132. The same data, binned by cell volume  
568 at budding, are shown in Fig. 2F-H.

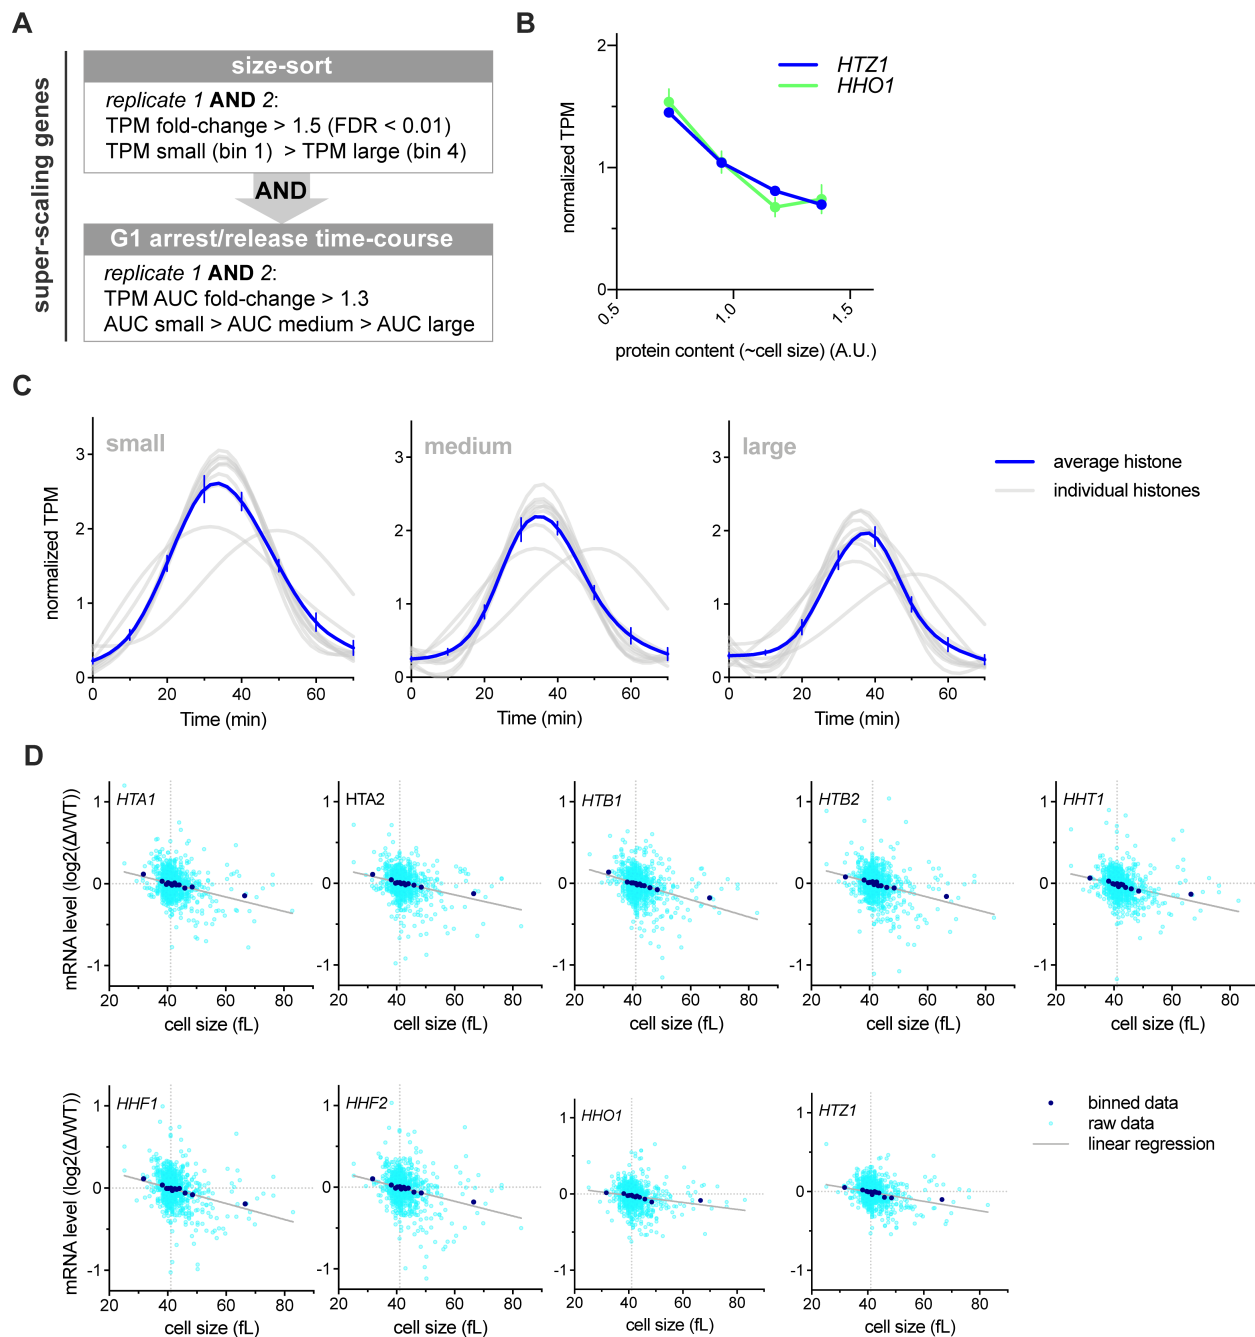

569

570

571 **Figure S4 | Histone gene expression sub-scales with cell size**

572 Related to Figure 3.

573 (A) Criteria used to classify genes with sub-scaling transcript amounts. Genes whose expression  
 574 changed in a manner similar to *WHI5* in both replicates of the size-sort (see Fig. 1D-F) and in the G1  
 575 arrest/release time course (see Fig. 2A-D) were classified as sub-scaling genes. See Materials and  
 576 Methods for further details.

577 (B) Normalized TPM (TPM / mean TPM) for *HTZ1* and *HHO1* mRNA in cells of different sizes (total  
578 protein content). Mean ( $\pm$  range) of two biological replicates is plotted. Changes in TPM are  
579 proportional to changes in mRNA concentration. See Figure S1 and Materials and Methods for further  
580 details.

581 (C) Normalized histone mRNA TPM (TPM / mean TPM) of small, medium or large cells at 10-minute  
582 time intervals synchronously progressing through the cell cycle. A smoothing spline fitted to the mean  
583 normalized TPM from two biological replicates for each histone is plotted in grey. A Spline fitted to  
584 mean ( $\pm$  SEM) of all histones is shown in blue.

585 (D) Comparison of histone mRNA levels in 1,484 gene deletions, relative to wild-type (Kemmeren et  
586 al., 2014; O'Duibhir et al., 2014) with cell size of the respective gene deletions (Jorgensen et al., 2002).  
587 Each graph plots a single transcript and each point represents a single gene deletion. See Materials  
588 and Methods for details. Distribution of Pearson R correlation coefficients for all genes in is show in  
589 Fig. 3F.

590

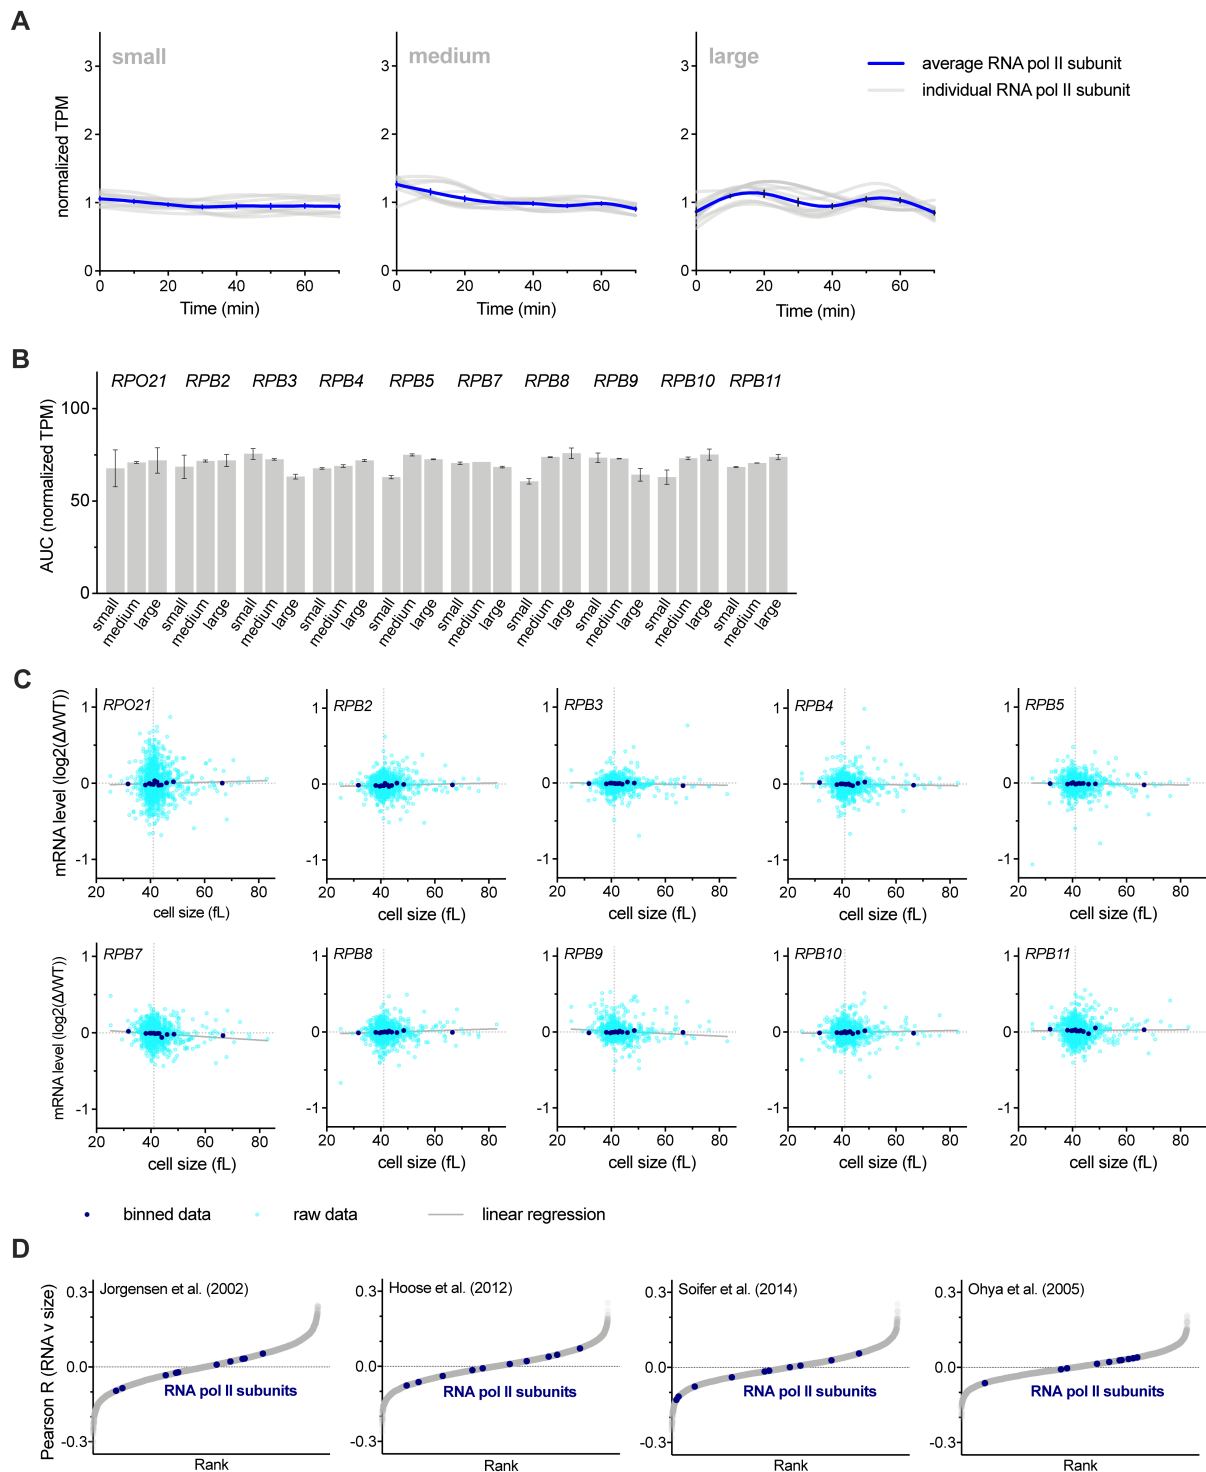

591  
592

593 **Figure S5 | RNA polymerase II subunit gene expression scales and is proportional to cell size**

594 Related to Figure 3

595 (A) Normalized RNA polymerase II subunit mRNA TPM (TPM / mean TPM) for small, medium, and  
596 large cells at 10-minute time intervals synchronously progressing through the cell cycle. A smoothing-

597 spline fitted to the average normalized TPM from two biological replicates for each subunit is plotted  
598 in grey. A Spline fitted to the mean ( $\pm$  SEM) of all subunits is shown in blue.

599 (B) The Area Under the Curve (AUC) of mean normalized RNA polymerase II subunit mRNA TPM of  
600 small, medium, and large cells synchronously progressing through the cell cycle. The AUC mean ( $\pm$   
601 range) of two biological replicates is plotted.

602 (C) Comparison of RNA polymerase II subunit mRNA levels in 1,484 gene deletions, relative to wild-  
603 type (Kemmeren et al., 2014; O'Duibhir et al., 2014) with cell size of the respective gene deletions  
604 (Jorgensen et al., 2002). Each graph plots a single transcript and each point represents a single gene  
605 deletion. See Materials and Methods for details.

606 (D) Pearson correlation coefficient, R, for the correlation between mRNA levels relative to wild-type in  
607 1,484 gene deletion strains (Kemmeren et al., 2014; O'Duibhir et al., 2014) and the cell size of the  
608 respective gene deletions for four different data sets of size measurements (Hoose et al., 2012;  
609 Jorgensen et al., 2002; Ohya et al., 2005; Soifer and Barkai, 2014). Each point represents an individual  
610 gene. RNA polymerase II subunit mRNAs are shown in blue.

611

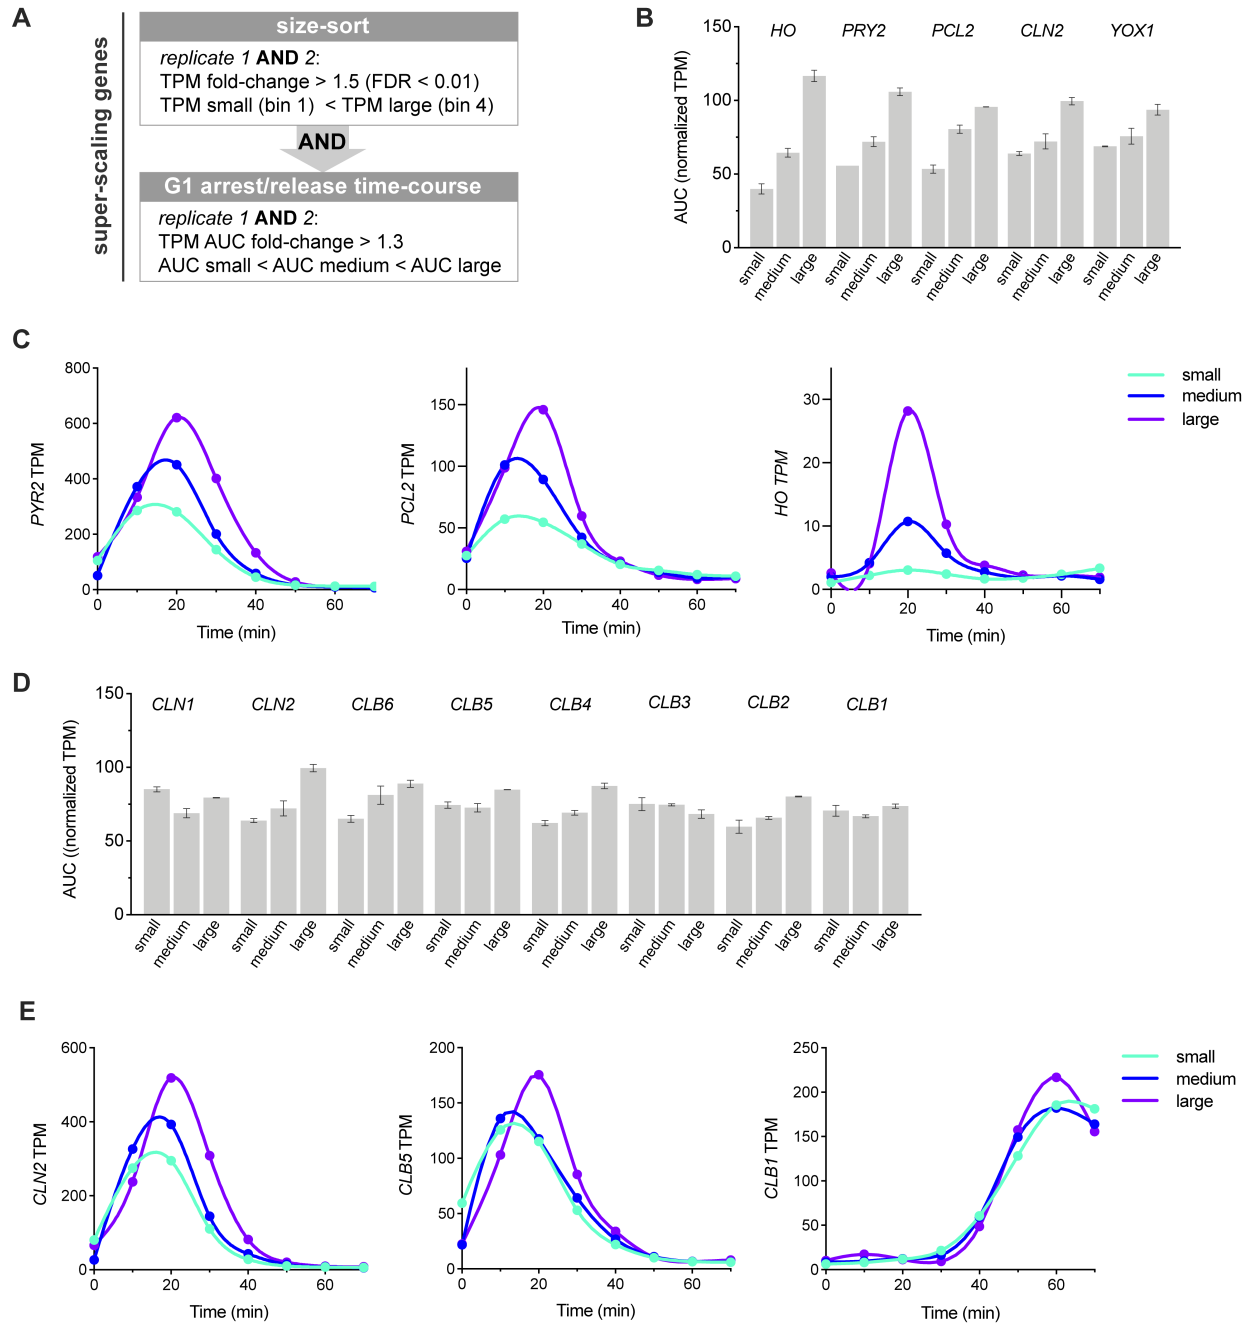

612

613 **Figure S6 | SBF regulated super-scaling genes and cyclin expression during the cell cycle in**  
 614 **cells of different sizes**

615 Related to Figure 3.

616 (A) Criteria used to classify genes with super-scaling transcript amounts. Genes whose expression  
 617 increased in both replicates of the size-sort and in the G1 arrest/release time course were classified  
 618 as super-scaling genes. See Materials and Methods for further details.

619 (B) The Area Under the Curve (AUC) of mean normalized TPM of small, medium, and large cells  
620 synchronously progressing through the cell cycle for SBF-regulated super-scaling transcripts. See Fig.  
621 S2 for experimental details. The AUC mean ( $\pm$  range) of two biological replicates is plotted.  
622 (C) SBF-regulated super-scaling genes TPM for small, medium, and large cells synchronously  
623 progressing through the cell cycle. Data for one replicate is plotted and is representative of both  
624 replicates.  
625 (D) The Area Under the Curve (AUC) of mean normalized TPM of small, medium, and large cells  
626 synchronously progressing through the cell cycle for cyclin transcripts. The AUC mean ( $\pm$  range) of  
627 two biological replicates is plotted.  
628 (E) Cyclin genes TPM for small, medium, and large cells synchronously progressing through the cell  
629 cycle. See Fig. S2 for experimental details. Data for one replicate is plotted and is representative of  
630 both replicates.



631

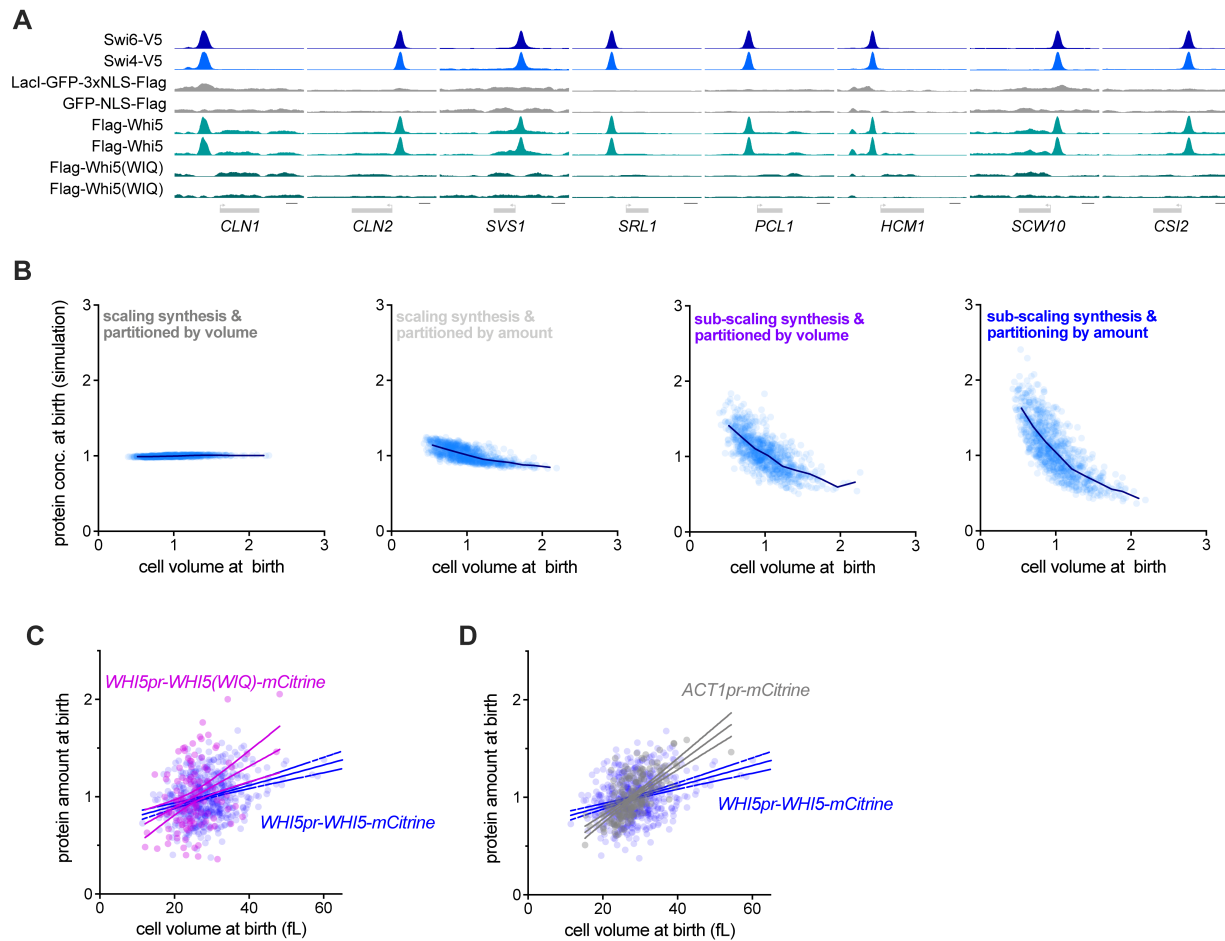

632

633

634 **Figure S7 | Sub-scaling expression is inherited through asymmetric division due to DNA-**  
635 **mediated partitioning**

636 Related to Figure 5.

637 (A) anti-V5 or anti-Flag ChIP-seq experiments were performed using cells expressing the indicated  
638 fusion proteins (left hand side). Data are shown for 8 example SBF binding sites near the denoted  
639 genes. Cells expressing Lacl-GFP-3xNLS-FLAG or GFP-NLS-FLAG were included as controls for  
640 non-specific ChIP signal. Whi5 recruitment to DNA overlaps with SBF (Swi4 and Swi6) binding sites  
641 but is lost in the Whi5(WIQ) variant (Travesa et al., 2013). Summary metagene plots for a subset of  
642 these data are also shown in Fig. 5C.

643 (B) Simulation protein concentration at birth as a function of daughter volume at birth. Four different  
644 conditions were simulated where protein expression was either in proportion to cell size (scaling) or  
645 independent of cell size (sub-scaling), and protein partitioning is either by amount or in proportion to  
646 cell volume. Individual simulated cells (light blue) as well as bin means (dark blue) are plotted. Protein  
647 amounts from the same simulation are shown in Fig. 5D.

648 (C&D) Protein amount at birth for *WHI5pr-WHI5-mCitrine* and (C) *WHI5pr-WHI5(WIQ)-mCitrine* or (D)  
649 *ACT1pr-mCitrine* cells. Linear regression (solid line) and 95% confidence interval (dashed lines) are  
650 shown.

651 Note, Fig. 5E shows bin means of the same data as (C) binned by cell volume at birth.

652

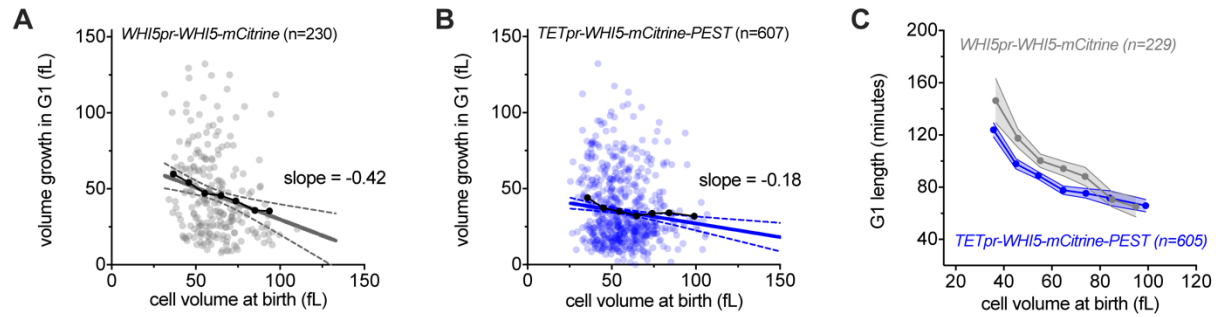

653

654

655 **Figure S8 | Expression of Whi5-PEST fusion protein from a synthetic TET-inducible promoter**  
656 **attenuates G1 size control**

657 Related to Figure 6

658 (A&B) Cell volume growth in G1 (birth to budding) plotted against cell volume at birth for (A) *WHI5pr-*  
659 *WHI5-mCitrine bck2Δ* and (B) *TETpr-WHI5-mCitrine-PEST bck2Δ*. Linear regression (solid line) and  
660 95% confidence interval (dashed lines) are shown. Linear regressions are calculated after outlier  
661 removal (Q=1%), which resulted in 2 (A) and 7 (B) cells being excluded respectively. Note, Fig. 6D  
662 shows bin means of the same data binned by cell volume at birth.

663 (C) Time in G1 as a function of cell size at birth, for cells with a completed G1. Data are binned  
664 according to cell size at birth for cells with a completed G1 and the bin means ( $\pm$  SEM) are plotted.

665 **Table S1 – List of *S. cerevisiae* strains used in this study and full genotypes**

666

|          |                                                      |                                                                                                                                                               |
|----------|------------------------------------------------------|---------------------------------------------------------------------------------------------------------------------------------------------------------------|
| A17896   | <i>Amon lab</i>                                      | <i>W303; MATa, ADE2, cdc28-13</i>                                                                                                                             |
| DCB99    | <i>This study</i>                                    | <i>W303; MATa, ADE2, WHI5-mCitrine::URA3</i>                                                                                                                  |
| MK551-1  | <i>This study</i>                                    | <i>W303; MATa, bar1Δ::HisG, whi5Δ::LEU2, cln3Δ::hphMX</i>                                                                                                     |
| HTA1-GFP | <i>GFP collection</i><br>( <i>Huh et al., 2003</i> ) | <i>BY4741; HTA1-GFP</i>                                                                                                                                       |
| HTB2-GFP | <i>GFP collection</i><br>( <i>Huh et al., 2003</i> ) | <i>BY4741; HTB2-GFP</i>                                                                                                                                       |
| HTZ1-GFP | <i>GFP collection</i><br>( <i>Huh et al., 2003</i> ) | <i>BY4741; HTZ1-GFP</i>                                                                                                                                       |
| RPB3-GFP | <i>GFP collection</i><br>( <i>Huh et al., 2003</i> ) | <i>BY4741; RPB3-GFP</i>                                                                                                                                       |
| DCB72    | <i>This study</i>                                    | <i>W303; MATa, ADE2, ura3:: WHI5pr(1kb)-mCitrine-CYC1term</i>                                                                                                 |
| KSY108-1 | <i>Lab collection</i>                                | <i>W303; ADE2, WHI5-mCitrine-HIS3</i>                                                                                                                         |
| KSY190-2 | <i>This study</i>                                    | <i>W303; ADE2, whi5Δ::KanMX URA3::WHI5pr(1kb)-WHI5-WIQ-mCitrine-ADH1term</i>                                                                                  |
| KSY160-2 | <i>This study</i>                                    | <i>W303; ADE, URA3::ACT1pr(1kb) -Whi5-mCitrine-CYC1term</i>                                                                                                   |
| KSY158-1 | <i>Lab collection</i>                                | <i>W303; ADE2, URA3:: ACT1pr(1kb)-mCitrine-CYC1term</i>                                                                                                       |
| MS534    | <i>This study</i>                                    | <i>W303; bar1Δ::HisG, GFP-3xNLS-FLAG</i>                                                                                                                      |
| MS535    | <i>This study</i>                                    | <i>W303; bar1Δ::HisG, LacI-GFP-3xNLS-FLAG</i>                                                                                                                 |
| MS536    | <i>This study</i>                                    | <i>W303; bar1Δ::HisG, whi5Δ::LEU2, URA3::WHI5pr(1kb)-3xFLAG-WHI5-CYC1term</i>                                                                                 |
| MS537    | <i>This study</i>                                    | <i>W303; bar1Δ::HisG, URA3::WHI5pr(1kb)-3xFLAG-WHI5(WIQ)-CYC1term</i>                                                                                         |
| MK653-1  | <i>This study</i>                                    | <i>W303; bar1Δ::HisG, SWI4-V5::hphMX6</i>                                                                                                                     |
| MK645-1  | <i>This study</i>                                    | <i>W303; bar1Δ::HisG, SWI6-V5::hphMX6</i>                                                                                                                     |
| M364     | <i>This study</i>                                    | <i>W303; whi5Δ::cgTRP; bck2Δ::hphNT, myo1-3xmKate2::kanMX6, leu1::PtetO7.1-WHI5-mCitrine-PEST::LEU1, WTC846(PrtetO-7.1-TetR, PrRNR2-TetR-TUP1)::HIS3, ADE</i> |
| M367     | <i>This study</i>                                    | <i>W303; whi5Δ::cgTRP; bck2Δ::hphNT1, myo1-3xmKate2::kanMX6, WHI5pr[1kb]-WHI5-mCitrine::URA3, WTC846(PrtetO-7.1-TetR_PrRNR2-TetR-TUP1)::HIS3, ADE</i>         |

667

668 **REFERENCES**

- 669 Andrews, B.J., and Herskowitz, I. (1989). Identification of a DNA binding factor involved in cell-cycle  
670 control of the yeast HO gene. *Cell* 57, 21-29.
- 671 Azizoğlu, A., Brent, R., and Rudolf, F. (2020). A precisely adjustable, variation-suppressed eukaryotic  
672 transcriptional controller to enable genetic discovery. *bioRxiv* 2019.12.12.874461.
- 673 Barber, F., Amir, A., and Murray, A.W. (2020). Cell-size regulation in budding yeast does not depend on  
674 linear accumulation of Whi5. *Proc Natl Acad Sci U S A* 117, 14243-14250.
- 675 Chandler-Brown, D., Schmoller, K.M., Winetraub, Y., and Skotheim, J.M. (2017). The Adder Phenomenon  
676 Emerges from Independent Control of Pre- and Post-Start Phases of the Budding Yeast Cell Cycle. *Curr*  
677 *Biol* 27, 2774-2783 e2773.
- 678 Chen, Y., Zhao, G., Zahumensky, J., Honey, S., and Futcher, B. (2020). Differential Scaling of Gene  
679 Expression with Cell Size May Explain Size Control in Budding Yeast. *Mol Cell* 78, 359-370 e356.
- 680 Chia, W., Somers, W.G., and Wang, H. (2008). Drosophila neuroblast asymmetric divisions: cell cycle  
681 regulators, asymmetric protein localization, and tumorigenesis. *J Cell Biol* 180, 267-272.
- 682 Costanzo, M., Nishikawa, J.L., Tang, X., Millman, J.S., Schub, O., Breitkreuz, K., Dewar, D., Rupes, I.,  
683 Andrews, B., and Tyers, M. (2004). CDK activity antagonizes Whi5, an inhibitor of G1/S transcription in  
684 yeast. *Cell* 117, 899-913.
- 685 Creanor, J., and Mitchison, J.M. (1982). Patterns of protein synthesis during the cell cycle of the fission  
686 yeast *Schizosaccharomyces pombe*. *J Cell Sci* 58, 263-285.
- 687 Cross, S.L., and Smith, M.M. (1988). Comparison of the structure and cell cycle expression of mRNAs  
688 encoded by two histone H3-H4 loci in *Saccharomyces cerevisiae*. *Mol Cell Biol* 8, 945-954.
- 689 de Bruin, R.A., McDonald, W.H., Kalashnikova, T.I., Yates, J., 3rd, and Wittenberg, C. (2004). Cln3  
690 activates G1-specific transcription via phosphorylation of the SBF bound repressor Whi5. *Cell* 117, 887-  
691 898.
- 692 Di Talia, S., Skotheim, J.M., Bean, J.M., Siggia, E.D., and Cross, F.R. (2007). The effects of molecular  
693 noise and size control on variability in the budding yeast cell cycle. *Nature* 448, 947-951.
- 694 Dobin, A., Davis, C.A., Schlesinger, F., Drenkow, J., Zaleski, C., Jha, S., Batut, P., Chaisson, M., and  
695 Gingeras, T.R. (2013). STAR: ultrafast universal RNA-seq aligner. *Bioinformatics* 29, 15-21.
- 696 Doncic, A., Eser, U., Atay, O., and Skotheim, J.M. (2013). An algorithm to automate yeast segmentation  
697 and tracking. *PLoS One* 8, e57970.
- 698 Doncic, A., Falleur-Fettig, M., and Skotheim, J.M. (2011). Distinct interactions select and maintain a  
699 specific cell fate. *Mol Cell* 43, 528-539.
- 700 Eden, E., Navon, R., Steinfeld, I., Lipson, D., and Yakhini, Z. (2009). GOrilla: a tool for discovery and  
701 visualization of enriched GO terms in ranked gene lists. *BMC Bioinformatics* 10, 48.
- 702 Elliott, S.G. (1983). Coordination of growth with cell division: regulation of synthesis of RNA during the cell  
703 cycle of the fission yeast *Schizosaccharomyces pombe*. *Mol Gen Genet* 192, 204-211.
- 704 Elliott, S.G., and McLaughlin, C.S. (1979). Regulation of RNA synthesis in yeast. III. Synthesis during the  
705 cell cycle. *Mol Gen Genet* 169, 237-243.

- 706 Elliott, S.G., Warner, J.R., and McLaughlin, C.S. (1979). Synthesis of ribosomal proteins during the cell  
707 cycle of the yeast *Saccharomyces cerevisiae*. *J Bacteriol* *137*, 1048-1050.
- 708 Eser, U., Falleur-Fettig, M., Johnson, A., and Skotheim, J.M. (2011). Commitment to a cellular transition  
709 precedes genome-wide transcriptional change. *Mol Cell* *43*, 515-527.
- 710 Feng, J., Liu, T., Qin, B., Zhang, Y., and Liu, X.S. (2012). Identifying ChIP-seq enrichment using MACS.  
711 *Nat Protoc* *7*, 1728-1740.
- 712 Ferrezuelo, F., Colomina, N., Fitcher, B., and Aldea, M. (2010). The transcriptional network activated by  
713 Cln3 cyclin at the G1-to-S transition of the yeast cell cycle. *Genome Biol* *11*, R67.
- 714 Fraser, R.S., and Nurse, P. (1978). Novel cell cycle control of RNA synthesis in yeast. *Nature* *271*, 726-  
715 730.
- 716 Fraser, R.S., and Nurse, P. (1979). Altered patterns of ribonucleic acid synthesis during the cell cycle: a  
717 mechanism compensating for variation in gene concentration. *J Cell Sci* *35*, 25-40.
- 718 Gunjan, A., and Verreault, A. (2003). A Rad53 kinase-dependent surveillance mechanism that regulates  
719 histone protein levels in *S. cerevisiae*. *Cell* *115*, 537-549.
- 720 Hoose, S.A., Rawlings, J.A., Kelly, M.M., Leitch, M.C., Ababneh, Q.O., Robles, J.P., Taylor, D., Hoover,  
721 E.M., Hailu, B., McEnery, K.A., *et al.* (2012). A systematic analysis of cell cycle regulators in yeast reveals  
722 that most factors act independently of cell size to control initiation of division. *PLoS Genet* *8*, e1002590.
- 723 Hu, B., Petela, N., Kurze, A., Chan, K.L., Chopard, C., and Nasmyth, K. (2015). Biological  
724 chromodynamics: a general method for measuring protein occupancy across the genome by calibrating  
725 ChIP-seq. *Nucleic Acids Res* *43*, e132.
- 726 Huh, W.K., Falvo, J.V., Gerke, L.C., Carroll, A.S., Howson, R.W., Weissman, J.S., and O'Shea, E.K.  
727 (2003). Global analysis of protein localization in budding yeast. *Nature* *425*, 686-691.
- 728 Johnston, G.C., Pringle, J.R., and Hartwell, L.H. (1977). Coordination of growth with cell division in the  
729 yeast *Saccharomyces cerevisiae*. *Exp Cell Res* *105*, 79-98.
- 730 Jorgensen, P., Edgington, N.P., Schneider, B.L., Rupes, I., Tyers, M., and Fitcher, B. (2007). The size of  
731 the nucleus increases as yeast cells grow. *Mol Biol Cell* *18*, 3523-3532.
- 732 Jorgensen, P., Nishikawa, J.L., Bretkreutz, B.J., and Tyers, M. (2002). Systematic identification of  
733 pathways that couple cell growth and division in yeast. *Science* *297*, 395-400.
- 734 Keifenheim, D., Sun, X.M., D'Souza, E., Ohira, M.J., Magner, M., Mayhew, M.B., Marguerat, S., and  
735 Rhind, N. (2017). Size-Dependent Expression of the Mitotic Activator Cdc25 Suggests a Mechanism of  
736 Size Control in Fission Yeast. *Curr Biol* *27*, 1491-1497 e1494.
- 737 Kemmeren, P., Sameith, K., van de Pasch, L.A., Benschop, J.J., Lenstra, T.L., Margaritis, T., O'Duibhir,  
738 E., Apweiler, E., van Wageningen, S., Ko, C.W., *et al.* (2014). Large-scale genetic perturbations reveal  
739 regulatory networks and an abundance of gene-specific repressors. *Cell* *157*, 740-752.
- 740 Koch, C., Moll, T., Neuberg, M., Ahorn, H., and Nasmyth, K. (1993). A role for the transcription factors  
741 Mbp1 and Swi4 in progression from G1 to S phase. *Science* *261*, 1551-1557.
- 742 Langmead, B., Trapnell, C., Pop, M., and Salzberg, S.L. (2009). Ultrafast and memory-efficient alignment  
743 of short DNA sequences to the human genome. *Genome Biol* *10*, R25.

- 744 Lock, A., Rutherford, K., Harris, M.A., Hayles, J., Oliver, S.G., Bahler, J., and Wood, V. (2019). PomBase  
745 2018: user-driven reimplementations of the fission yeast database provides rapid and intuitive access to  
746 diverse, interconnected information. *Nucleic Acids Res* 47, D821-D827.
- 747 Love, M.I., Huber, W., and Anders, S. (2014). Moderated estimation of fold change and dispersion for  
748 RNA-seq data with DESeq2. *Genome Biol* 15, 550.
- 749 Marguerat, S., and Bahler, J. (2012). Coordinating genome expression with cell size. *Trends Genet* 28,  
750 560-565.
- 751 Marguerat, S., Schmidt, A., Codlin, S., Chen, W., Aebersold, R., and Bahler, J. (2012). Quantitative  
752 analysis of fission yeast transcriptomes and proteomes in proliferating and quiescent cells. *Cell* 151, 671-  
753 683.
- 754 Mateus, C., and Avery, S.V. (2000). Destabilized green fluorescent protein for monitoring dynamic  
755 changes in yeast gene expression with flow cytometry. *Yeast* 16, 1313-1323.
- 756 Moran, L., Norris, D., and Osley, M.A. (1990). A yeast H2A-H2B promoter can be regulated by changes in  
757 histone gene copy number. *Genes Dev* 4, 752-763.
- 758 Nasmyth, K., and Dirick, L. (1991). The role of SWI4 and SWI6 in the activity of G1 cyclins in yeast. *Cell*  
759 66, 995-1013.
- 760 Neumann, F.R., and Nurse, P. (2007). Nuclear size control in fission yeast. *J Cell Biol* 179, 593-600.
- 761 Neurohr, G.E., Terry, R.L., Lengefeld, J., Bonney, M., Brittingham, G.P., Moretto, F., Miettinen, T.P.,  
762 Vaites, L.P., Soares, L.M., Paulo, J.A., *et al.* (2019). Excessive Cell Growth Causes Cytoplasm Dilution  
763 And Contributes to Senescence. *Cell* 176, 1083-1097 e1018.
- 764 Norris, D., and Osley, M.A. (1987). The two gene pairs encoding H2A and H2B play different roles in the  
765 *Saccharomyces cerevisiae* life cycle. *Mol Cell Biol* 7, 3473-3481.
- 766 O'Duibhir, E., Lijnzaad, P., Benschop, J.J., Lenstra, T.L., van Leenen, D., Groot Koerkamp, M.J.,  
767 Margaritis, T., Brok, M.O., Kemmeren, P., and Holstege, F.C. (2014). Cell cycle population effects in  
768 perturbation studies. *Mol Syst Biol* 10, 732.
- 769 Ohya, Y., Sese, J., Yukawa, M., Sano, F., Nakatani, Y., Saito, T.L., Saka, A., Fukuda, T., Ishihara, S.,  
770 Oka, S., *et al.* (2005). High-dimensional and large-scale phenotyping of yeast mutants. *Proc Natl Acad*  
771 *Sci U S A* 102, 19015-19020.
- 772 Padovan-Merhar, O., Nair, G.P., Biaesch, A.G., Mayer, A., Scarfone, S., Foley, S.W., Wu, A.R.,  
773 Churchman, L.S., Singh, A., and Raj, A. (2015). Single mammalian cells compensate for differences in  
774 cellular volume and DNA copy number through independent global transcriptional mechanisms. *Mol Cell*  
775 58, 339-352.
- 776 Parts, L., Liu, Y.C., Tekkedil, M.M., Steinmetz, L.M., Caudy, A.A., Fraser, A.G., Boone, C., Andrews, B.J.,  
777 and Rosebrock, A.P. (2014). Heritability and genetic basis of protein level variation in an outbred  
778 population. *Genome Res* 24, 1363-1370.
- 779 Pramila, T., Wu, W., Miles, S., Noble, W.S., and Breeden, L.L. (2006). The Forkhead transcription factor  
780 Hcm1 regulates chromosome segregation genes and fills the S-phase gap in the transcriptional circuitry  
781 of the cell cycle. *Genes Dev* 20, 2266-2278.
- 782 Qu, Y., Jiang, J., Liu, X., Wei, P., Yang, X., and Tang, C. (2019). Cell Cycle Inhibitor Whi5 Records  
783 Environmental Information to Coordinate Growth and Division in Yeast. *Cell Rep* 29, 987-994 e985.

- 784 Raj, A., and Tyagi, S. (2010). Detection of individual endogenous RNA transcripts in situ using multiple  
785 singly labeled probes. *Methods Enzymol* 472, 365-386.
- 786 Roberts, A., and Pachter, L. (2013). Streaming fragment assignment for real-time analysis of sequencing  
787 experiments. *Nat Methods* 10, 71-73.
- 788 Schmoller, K.M., Turner, J.J., Koivomagi, M., and Skotheim, J.M. (2015). Dilution of the cell cycle inhibitor  
789 Whi5 controls budding-yeast cell size. *Nature* 526, 268-272.
- 790 Shipony, Z., Marinov, G.K., Swaffer, M.P., Sinnott-Armstrong, N.A., Skotheim, J.M., Kundaje, A., and  
791 Greenleaf, W.J. (2020). Long-range single-molecule mapping of chromatin accessibility in eukaryotes.  
792 *Nat Methods*.
- 793 Skotheim, J.M., Di Talia, S., Siggia, E.D., and Cross, F.R. (2008). Positive feedback of G1 cyclins  
794 ensures coherent cell cycle entry. *Nature* 454, 291-296.
- 795 Soifer, I., and Barkai, N. (2014). Systematic identification of cell size regulators in budding yeast. *Mol Syst*  
796 *Biol* 10, 761.
- 797 Sulston, J.E., Schierenberg, E., White, J.G., and Thomson, J.N. (1983). The embryonic cell lineage of the  
798 nematode *Caenorhabditis elegans*. *Dev Biol* 100, 64-119.
- 799 Sun, X.M., Bowman, A., Priestman, M., Bertaux, F., Martinez-Segura, A., Tang, W., Whilding, C.,  
800 Dormann, D., Shahrezaei, V., and Marguerat, S. (2020). Size-Dependent Increase in RNA Polymerase II  
801 Initiation Rates Mediates Gene Expression Scaling with Cell Size. *Curr Biol* 30, 1217-1230 e1217.
- 802 Travesa, A., Kalashnikova, T.I., de Bruin, R.A., Cass, S.R., Chahwan, C., Lee, D.E., Lowndes, N.F., and  
803 Wittenberg, C. (2013). Repression of G1/S transcription is mediated via interaction of the GTB motifs of  
804 Nrm1 and Whi5 with Swi6. *Mol Cell Biol* 33, 1476-1486.
- 805 Trcek, T., Chao, J.A., Larson, D.R., Park, H.Y., Zenklusen, D., Shenoy, S.M., and Singer, R.H. (2012).  
806 Single-mRNA counting using fluorescent in situ hybridization in budding yeast. *Nat Protoc* 7, 408-419.
- 807 Turner, J.J., Ewald, J.C., and Skotheim, J.M. (2012). Cell size control in yeast. *Curr Biol* 22, R350-359.
- 808 Tutucci, E., Vera, M., Biswas, J., Garcia, J., Parker, R., and Singer, R.H. (2018). An improved MS2  
809 system for accurate reporting of the mRNA life cycle. *Nat Methods* 15, 81-89.
- 810 Youk, H., Raj, A., and van Oudenaarden, A. (2010). Imaging single mRNA molecules in yeast. *Methods*  
811 *Enzymol* 470, 429-446.
- 812 Zatulovskiy, E., Zhang, S., Berenson, D.F., Topacio, B.R., and Skotheim, J.M. (2020). Cell growth dilutes  
813 the cell cycle inhibitor Rb to trigger cell division. *Science* 369, 466-471.
- 814 Zenklusen, D., Larson, D.R., and Singer, R.H. (2008). Single-RNA counting reveals alternative modes of  
815 gene expression in yeast. *Nat Struct Mol Biol* 15, 1263-1271.
- 816 Zhurinsky, J., Leonhard, K., Watt, S., Marguerat, S., Bahler, J., and Nurse, P. (2010). A coordinated  
817 global control over cellular transcription. *Curr Biol* 20, 2010-2015.  
818



819 **Acknowledgments.** We thank Bruce Fitcher and Yuping Chen for invaluable advice on centrifugal  
820 elutriation, Christine Jacobs-Wagner and Helena Cantwell for comments on the manuscript, members  
821 of the Skotheim laboratory for constructive feedback, Gabriel Neurohr for sending strain A17896, Chris  
822 You for assistance with the ChIP-seq experiments and Jon Turner for help in optimizing the smFISH  
823 protocol. This work was supported by the NIH (GM092925 and GM115479), the HHMI-Simons (JMS,  
824 Faculty Scholars Program). MPS was supported by a Simons Foundation Fellowship of the Life  
825 Sciences Research Foundation and an EMBO Long-Term Postdoctoral Fellowship. KMS was  
826 supported by the Human Frontier Science Program (Postdoctoral Fellowship and Career Development  
827 Award).

828  
829 **Author contributions.** JMS supervised the work. MPS and JMS wrote the manuscript. MPS  
830 performed and analyzed all experiments except for live cell microscopy experiments performed by JK,  
831 DCB & KMS, and smFISH experiments performed by ML. Sequencing data analysis was performed  
832 by MPS and GM, supervised by WG & AK.

833

834 **Conflict of interests.** The authors declare no conflicts of interest.

## 835 MATERIALS AND METHODS

836

### 837 Yeast genetics

838 Standard procedures were used for *Saccharomyces cerevisiae* strain construction. Full genotypes of  
839 all strains used in this study are listed in Table S1. The strain for constitutive expression of WHI5  
840 (MS364) was constructed using the WTC846 tetracycline responsive promoter system (Azizoğlu et  
841 al., 2020).

842

### 843 Transcriptomic analysis of size-sorted cells

844 To determine transcript levels in cells of different sizes, S/G2/M cells were sorted according to total  
845 protein content by fluorescence activated cell sorting (FACS) before RNA extraction and sequencing.  
846 500ml *S. cerevisiae* (HTB2-GFP) was grown (synthetic complete media + 2% glucose at 30°C), and  
847 fixed at O.D. ~ 0.3 by addition of 500ml 80% methanol 20mM TRIS (-20°C) and then incubated at -  
848 20°C for 30 minutes. Cells were fixed to prevent gene expression changes during the course of the  
849 cell sorting, which requires multiple generation equivalents of time to complete. Cells were pelleted  
850 (13 krpm, 3 minutes) and washed 3x in PBS, before gentle sonication and then addition of 5µg/ml total  
851 protein dye (Alexa Fluor™ 647 NHS Ester dye; ThermoFisher Scientific; A20006) and incubation (4°C,  
852 30 minutes). Cells were again pelleted (13 krpm, 3 minutes) and washed 3x in PBS to remove excess  
853 dye before again being sonicated. Cells from four different size fractions were sorted on a FACS Aria  
854 II sorter (BD Biosciences) according to the following strategy. First, singlets were gated based on  
855 scatter (FSC and SSC), then S/G2/M cells were identified using an Htb2-GFP signal, and then finally,  
856 four bins of different total protein content cells were sorted based on the total protein intensity (bin 1 =  
857 lowest signal, bin 4 = highest, Fig. S1A). The fidelity of the total protein dye sort was confirmed by re-  
858 analyzing 10,000 cells on the same sorter (Fig. 1D & S1A). Furthermore, total protein content was  
859 validated as a proxy for size by measuring the cell volume of the different protein dye sorted cells  
860 using a Coulter counter (Fig. S1C-E).

861 Two biological replicates were performed. Within each biological replicate, two technical  
862 replicates were performed for each size bin so that four replicates were performed per bin in total. For  
863 the different bins within the same replicate set, a constant number of *S. pombe* cells, fixed as above,  
864 were added as a spike-in to measure total RNA content per *S. cerevisiae* cell. The number of *S.*  
865 *cerevisiae* cells and *S. pombe* cells (972 h-) per sample was constant within a set of replicates but  
866 varied slightly between each set of replicates (5-10 million *S. cerevisiae* cells and 5-10 million *S.*  
867 *pombe* cells). To maximize the number of reads from the experimental *S. cerevisiae* samples, *S.*  
868 *pombe* cells were nitrogen starved (grown in EMM before media switch to EMM - NH<sub>4</sub>Cl for 24 hours  
869 at 30°C) because this reduces their mRNA concentration (Marguerat et al., 2012). Cells were then  
870 pelleted (4 krpm, 15 minutes), and their RNA extracted and sequenced as described below. For each

871 set of replicates, the *S. pombe* spike-in was added independently and RNA was extracted  
872 independently.

873 To estimate the relative amount of mRNA per cell in each size bin, the number of *S. cerevisiae*  
874 reads per *S. pombe* read was calculated (see RNA-seq data processing below) and then normalized  
875 to the mean value within a set of replicates. The normalized total mRNA per sample was then averaged  
876 between the four replicates (Fig. S1B).

877

### 878 **Transcriptomic analysis of differently sized cells synchronously progressing through the cell** 879 **cycle**

880 To determine transcript levels during the cell cycle in cells of different sizes, cells were elutriated and  
881 arrested in G1 for different amounts of time. Samples were then collected during the synchronous  
882 progression from G1 through S, G2 and M phases of the cell cycle for RNA extraction and sequencing  
883 (See Fig. S2 for schematic of experimental design). Specifically, 4L *S. cerevisiae* (A17896: *W303*  
884 *cdc28-13*) were grown in synthetic complete (SC) media with 2% glucose at 25°C to OD ~0.75 and  
885 then collected on a filter membrane and resuspend in ice-cold SC media (no carbon source). Cells  
886 were then sonicated (3 x 20 seconds, 3 minutes on ice between sonication cycles) and loaded into a  
887 JE 5.0 elutriation rotor fitted for a two-chamber run (Beckman Coulter) in a J6-MI Centrifuge (2.4krpm,  
888 4°C). The elutriation chambers were pre-equilibrated and run with SC media (4°C, no carbon source).  
889 The pump speed was gradually increased until G1 cells with minimal debris were collected. G1  
890 fractions were then collected on a filter and resuspended in 37°C conditioned SC media + 2% glucose  
891 in a 37°C shaking water-bath (OD ~ 0.1). The G1 arrest was maintained at 37°C until cells reached  
892 either 36-39 fL (small), 67-69 fL (medium) or 129-131 fL (large) as determined by Coulter counter (Fig.  
893 S2B-C). When they reached the target size, cells were released from the G1 arrest. To do this, cells  
894 were collected on a filter membrane and resuspended in 25°C SC media + 2% glucose (OD ~0.35).  
895 Samples for size measurement by Coulter counter, DNA-content analysis, and RNA-extraction were  
896 taken at 10-minute intervals after release with the 0-minute time point being designated as the time  
897 point 30 minutes before the onset of DNA replication (Fig. S2D-E). For small cells, the 0-minute time  
898 point was collected 40-50 minutes after the shift to the permissive temperature, for medium cells the  
899 0-minute time point was collected 10 minutes after the shift to the permissive temperature and for large  
900 cells the 0-minute time point was collected 0 minutes after shift to the permissive temperature. Two  
901 biological replicates were performed.

902 For DNA-content analysis, 0.4 mL culture was added to 1 mL 100% 4°C ethanol and stored at  
903 4°C. Cells were pelleted (13 krpm, 2 minutes), washed, and resuspended in 50 mM Sodium Citrate  
904 (pH = 7.2), incubated with 0.2 mg/mL RNase A (overnight, 37°C) and then 0.4 mg/mL proteinase K (1  
905 hour, 50°C) before addition of 25 µM Sytox Green (ThermoFisher Scientific). Cells were then sonicated  
906 and DNA-content was analyzed for >10000 events on a FACScan Analyzer (BD Biosciences). For

907 RNA-extraction 1.5 mL cells were pelleted (13 krpm, 30 seconds) and snap frozen in liquid N<sub>2</sub>.  
908 Samples were then thawed in TRI Reagent (Zymo Research) and RNA was extracted as described  
909 below (RNA extraction and sequencing).

910

### 911 **RNA extraction and sequencing**

912 To extract RNA, cell pellets were lysed in 300 µL TRI Reagent (Zymo Research) by bead beating  
913 using a Fastprep 24 (4°C, settings: 5.0 m/s, 1 x 30 seconds). Cell debris was pelleted (13 krpm, 5  
914 minutes) and the supernatant recovered. RNA was then extracted using the direct-zol RNA microprep  
915 kit (Zymo Research). mRNA was enriched using the NEBNext Poly(A) mRNA Magnetic Isolation  
916 Module (NEB, E7490) and NEBNext Ultra II RNA Library Prep Kit for Illumina® (NEB, #E7775) was  
917 then used to prepare libraries for paired-end (2x150 bp) Illumina sequencing (Novogene). More than  
918 20 million reads were sequenced per sample.

919

### 920 **RNA-seq data processing**

921 Because some samples analyzed in this study contained *S. cerevisiae* as well as reference spike-in  
922 *S. pombe* RNA, a combined *S. cerevisiae* and *S. pombe* genome file was created using the sacCer3  
923 and ASM294v2 versions of the respective genomes and a combined transcriptome annotation was  
924 created using the *S. pombe* gene models available from PomBase (Lock et al., 2019) and an *S.*  
925 *cerevisiae* set of gene models updated using transcript-end mapping data as previously described  
926 (Shipony et al., 2020). For the purposes of RNA-seq data quality evaluation and genome browser track  
927 generation, reads were aligned against the combined genome and annotated set of splice junctions  
928 using the STAR aligner (version 2.5.3a; settings: --limitSjdbInsertNsj 1000000 --  
929 outFilterMultimapNmax 50 --outFilterMismatchNmax 999 --outFilterMismatchNoverReadLmax 0.04 --  
930 alignIntronMin 10 --alignIntronMax 1000000 --alignMatesGapMax 1000000 --alignSJoverhangMin 8 -  
931 -alignSJDBoverhangMin 1 --sjdbScore 1 --twopassMode Basic --twopass1readsN -1) (Dobin et al.,  
932 2013). Read mapping statistics and genome browser tracks were generated using custom Python  
933 scripts. For quantification purposes, reads were aligned as 2x50mers in transcriptome space against  
934 an index generated from the combined annotation described above using Bowtie (Langmead et al.  
935 2009; version 1.0.1; settings: -e 200 -a -X 1000). Alignments were then quantified using eXpress  
936 (version 1.5.1) (Roberts and Pachter, 2013) before effective read count values and TPM (Transcripts  
937 Per Million transcripts) were then separated for each genome and renormalized TPMs were calculated  
938 with respect to the total reads for *S. cerevisiae*.

939 Differential expression analysis by DESeq2 was performed using technical replicates to  
940 compare RNA-seq data from different size bins in the experiment shown in Figures 1D-F and S1 (Love  
941 et al., 2014). To calculate the total amount of transcription during the G1 arrest/release RNA-seq time  
942 course experiment (Fig. 2C-D & S2), TPM values were normalized to the mean for each experiment

943 and the Area Under the Curve (AUC) for TPM as a function of time was calculated for each time course  
944 using the R function `auc(type = "spline")` from the *MESS* package.

945

#### 946 **Classification of sub-scaling and super-scaling transcripts**

947 To classify transcripts whose expression sub-scales with cell size, we analyzed data from two  
948 experiments: (1) the RNA-seq experiment on size-sorted populations of cells (Fig. 1D-F and S1) and  
949 (2) the G1 arrest/release RNA-seq time course experiment (Fig. 2A-D and S2). Two biological  
950 replicates of each experiment were performed. Sub-scaling genes were classified as genes that  
951 passed the following criteria in both biological replicates of each experiment:

952 (1) At least one pair-wise comparison between the four-size bins has a false-discovery rate (FDR)  
953 adjusted p-value  $< 0.01$ , a TPM fold-change  $> 1.5$ , and bin 1 TPM  $>$  bin 4 TPM.

954 (2) Small cells' TPM Area Under Curve (AUC)  $>$  medium cells' TPM AUC  $>$  large cells' TPM AUC and  
955 TPM AUC fold-change  $> 1.3$ . See above (RNA-seq data processing) for details of the AUC calculation.

956 To classify transcripts whose expression sub-scales with cell size we applied same criteria as  
957 for sub-scaling genes but instead (1) bin 1 PM  $<$  bin 4 TPM and (2) Small cells' TPM Area Under  
958 Curve (AUC)  $<$  medium cells' TPM AUC  $<$  large cells' TPM AUC.

959

#### 960 **GO term enrichment**

961 GO term enrichment (Fig. 3A) was performed using the GOrilla GO analysis tool (Eden et al., 2009).  
962 Enrichment of size-independent gene transcripts was performed versus a background set of all genes  
963 that had a TPM value  $> 0$  in all RNA-seq samples.

964

#### 965 **Single-molecule fluorescence in situ hybridization (smFISH)**

966 smFISH was used to image *WHI5* and *MDN1* mRNAs in single cells. A Whi5-mCitrine tagged strain  
967 (DCB099) was used to discriminate pre- and post-*Start* G1 based on Whi5-mCitrine nuclear  
968 localization (Doncic et al., 2011). Early S/G2/M cells were defined as budded cells with a small ( $\leq 0.2$ )  
969 bud-to-mother volume ratio. Cells were grown at 30°C in synthetic complete (SC) media + 2% glycerol  
970 + 1% ethanol. Two biological replicates were performed. Each biological replicate contained two  
971 technical replicates (*i.e.*, two independent hybridizations to cells from the same culture). In addition,  
972 two negative controls were performed regularly where (i) FISH probes were omitted and (ii) a *whi5Δ*  
973 (MK551-1) strain was analyzed.

974 The smFISH protocol (detailed below) was optimized based on protocols from multiple prior  
975 studies (Raj and Tyagi, 2010; Trcek et al., 2012; Tutucci et al., 2018; Youk et al., 2010; Zenklusen et  
976 al., 2008). 45 mL cells (OD600  $\sim 0.2$ ) were fixed with 5 mL 37% formaldehyde and incubated (45  
977 minutes, room temperature, rotating). Cells were then pelleted (1600 g, 5 minutes) and washed twice  
978 in 1 mL of ice-cold fixation buffer (pH 7.5, 218 mg/mL sorbitol, 84 mM potassium phosphate dibasic,

979 16 mM potassium phosphate monobasic, dissolved in water for RNA work (Thermo Fisher Scientific,  
980 BP561-1)). Cells were again pelleted and resuspended in 900  $\mu$ L fixation buffer and gently sonicated  
981 before 100  $\mu$ L of 200 mM RNase inhibitor vanadyl ribonucleoside complex was added (New England  
982 BioLabs, S1402S). Cells were then digested by adding 3.5-5  $\mu$ L zymolyase stock (5 mg/mL 100T, MP  
983 Biomedicals, 0832093) and incubated (70-80 minutes, 30°C, rotating). Cells were then pelleted (400  
984 g, 6 minutes) and washed twice in 1 mL of ice-cold fixation buffer to stop digestion and finally  
985 permeabilized by resuspension in 1ml 70% ethanol. Permeabilized cells were kept at 4°C for 1 to 3  
986 days. 300  $\mu$ L of the permeabilized cells per hybridization sample were then pelleted (400 g, 7 minutes)  
987 and washed in 500  $\mu$ L of wash buffer A (Biosearch Technologies, SMF-WA1-60: prepared fresh on  
988 the day of use according to manufacturer's instructions always using a fresh aliquot of deionised  
989 formamide (EMD Millipore, S4117, stored at -20°C)). Permeabilized cells were then resuspended in  
990 100  $\mu$ L hybridisation solution (Biosearch Technologies, SMF-HB1-10) containing 1-3x of standard  
991 probe concentrations for *WHI5* and *MDN1* probes, 10 mM VRC and 0.5 mg/mL smFISH probe  
992 competitor E. coli tRNA (Roche, TRNAMRE- RO). Note VRC and probe competitor were omitted for  
993 half the cells analyzed in replicate 1. For *MDN1* mRNAs two probe sets, totaling 86 probes (38 + 48),  
994 coupled to the FAM (fluorescein amidite) dye (Biosearch Technologies, Stellaris Custom Probes) were  
995 used. The sequences of these probes were taken from Tutucci et al., 2018 (*MDN1*-3'ORF and *MDN1*-  
996 ORF). For *WHI5*, a set of 46 probes coupled to the Quasar570 dye (Biosearch Technologies, Stellaris  
997 Custom Probes) were used. *WHI5-mCitrine* Probe sequences were designed using Stellaris Probe  
998 Designer applied to the *WHI5-mCitrine* mRNA sequence. Probes were hybridized in the dark (30°C,  
999 overnight, with end-over-end rotation). 100  $\mu$ L of wash buffer A was then added before cells were  
1000 pelleted (400 g, 8 min) and supernatant was aspirated. Cells were resuspended in 1 mL wash buffer  
1001 A, incubated in the dark (30° C, 30 min), pelleted (400 g, 6 min), resuspended in 1 mL wash buffer A  
1002 +350  $\mu$ g/mL calcofluor white (Sigma, F3543), and again incubated in the dark (30°C, 30 min). Cells  
1003 were then resuspended in 1 mL wash buffer B (Biosearch Technologies, SMF-WB1-20), incubated for  
1004 2- 5 minutes at room temperature, pelleted (400 g, 6 minutes) and resuspended in 2 to 3 drops (~75  
1005  $\mu$ L) of Vectashield Antifade Mounting Medium (Vector Laboratories, H-1000). This suspension was  
1006 then mixed thoroughly by pipetting to separate clumped cells. 1.5  $\mu$ L of this solution was mounted on  
1007 an acid washed slide and imaged on a wide-field epifluorescence Zeiss Observer Z1 microscope  
1008 (63X/1.4NA oil immersion objective and a Colibri LED module). 30-step z-stacks (step size = 200 nm)  
1009 were imaged. Cell outlines were identified using phase contrast images. Quasar570 probes (*WHI5*)  
1010 were imaged in the orange channel (white LED module for 555 nm wavelength, 100% light power, 5  
1011 sec exposure per stack image). *Whi5-mCitrine* protein and FAM probes (*MDN1*) were imaged in the  
1012 yellow channel (505 nm LED module, 100% light power, 3.5 seconds exposure time). FAM FISH  
1013 probes alone were imaged in the green channel (470 nm LED module, 75% light power, 5 seconds  
1014 exposure time). Calcofluor white stain was imaged in the blue channel (365 nm LED module, 25%

1015 light power, 20 ms exposure). Under these conditions, no significant photobleaching was observed  
1016 after taking multiple images of the same cells.

1017 smFISH Image analysis was performed manually using ImageJ (version 2.0.0). Single cells  
1018 were manually selected in each image. A cell was only selected if its morphology was sufficiently intact  
1019 (following zymolyase treatment) and if the absence/presence of a bud and the nuclear/cytoplasmic  
1020 localization of Whi5-mCitrine protein could be assigned. Cell size was measured by drawing cell  
1021 outlines in the phase z-plane with the largest cell area, fitting a two-dimensional ellipse, and then  
1022 rotating the ellipse along its major axis to obtain a volume estimate. Separately calculated volumes for  
1023 mothers and buds were added together. Absolute counts of *WHI5-mCitrine* and *MDN1* mRNAs in  
1024 single cells were obtained by manual counting and single dots were counted as one mRNA (*i.e.*, we  
1025 did not quantify single dot intensities to try to discern multiple overlapping mRNAs).

1026

### 1027 **Live cell microscopy**

1028 Cells were grown to early log phase in synthetic complete (SC) media + 2% glycerol + 1% ethanol and  
1029 gently sonicated before being loaded into a CellASIC Y04C microfluidics plate (Milipore SIGMA) under  
1030 continuous media flow at 2 psi. Imaging, image segmentation, and pedigree tracking was performed  
1031 as previously described (Doncic et al., 2013; Schmoller et al., 2015) with the exception of the  
1032 experiments in Fig. 6 which were segmented and tracked using the convolutional neural network YeaZ  
1033 algorithm ([www.quantsysbio.com](http://www.quantsysbio.com)). For experiments in Fig. 6, Myo1-3xmKate2 signal at the bud neck  
1034 was also used aid the determination of mother-bud pairs and cytokinesis timing. Cells expressing GFP  
1035 proteins were exposed for 50 ms, cells expressing mCitrine were exposed for 400 ms and cells  
1036 expressing mKate2 were exposed for 1s. Background subtraction for variation in background  
1037 fluorescence in each frame of the movie was performed as previously describe (Chandler-Brown et  
1038 al., 2017). Briefly, in each frame cell and non-cell area was defined. A 4-pixel average filter was then  
1039 applied and the background was taken to be the median filtered pixel value of the non-cell area except  
1040 for experiments in Fig. 6 where background fluorescence was measured using median pixel values  
1041 from a collection of flatfield images. Differences in background fluorescence due to cell volume  
1042 dependent autofluorescence were accounted for as previously described (Schmoller et al., 2015).  
1043 Note that the analysis of *WHI5pr-WHI5-mCitrine* (Fig. 2F, S3G & 5B&E) includes cells previously  
1044 imaged for analysis reported in Schmoller et al., 2015.

1045

### 1046 **Gene deletion collection screen by microarray**

1047 We analyzed the correlation between RNA levels and cell size in 1,484 gene deletion stains using  
1048 published microarray data and cell size measurements of these strains (Hoose et al., 2012; Jorgensen  
1049 et al., 2002; Kemmeren et al., 2014; O'Duibhir et al., 2014; Ohya et al., 2005; Soifer and Barkai, 2014).  
1050 Gene expression changes relative to wild-type were from (O'Duibhir et al., 2014), where we used the

1051 dataset transformed to correct for effects of slow growth. The same trends were observed in the  
1052 uncorrected dataset. For each gene we then analyzed the correlation between the relative fold-change  
1053 of its expression in a given deletion with the size of that deletion strain across all the deletion strains  
1054 for which both data were available. Pearson correlation coefficients were calculated using the R  
1055 function *cor* (Fig. 3F & S5D).

1056

### 1057 **GFP fusion collection screen by flow cytometry**

1058 To examine the size-dependence of histone protein's expression, we analyzed a genome-wide dataset  
1059 of flow cytometry-based GFP intensity measurements (Parts et al., 2014), where each measurement  
1060 is from a single well containing two strains both expressing the same protein C-terminally fused to  
1061 GFP (Fig. 4A-C). One strain is in the BY4741 background (replicate 1) and the other in the RM11  
1062 background (replicate 2). Cells were grown in low fluorescence media containing 2% glucose and  
1063 measured using an BD LSRII flow cytometer as described in Parts et al., 2014. Cells were separated  
1064 into budded and unbudded populations on the basis of the side scatter width (SSC-W). Co-cultured  
1065 strains of each background were separated on the basis of HTB2-mCherry intensity (RM low, BY high).  
1066 Size was defined by the area of the side scatter signal (SSC-A). We used the lowest expressed gene  
1067 from each plate as a background for that plate, thereby controlling for plate-to-plate variation in  
1068 measurements. To calculate the background, we fitted a linear function to SSC-A and total GFP  
1069 fluorescence for these low-expressing cells (python function *polyfit(matplotlib)*). We then subtracted  
1070 the fit for these lowest expressing cells from the GFP intensity for all other cells. Strains with noisy  
1071 signals (*i.e.*, their mean expression is less than the standard deviation) and cells with saturated signals  
1072 (mean expression is greater than 200000) were excluded. SSC-A and background subtracted GFP  
1073 intensity were then normalized to the mean and a linear function was then fitted (python function  
1074 *polyfit(matplotlib)*). The slope of this function was used as a measurement for a protein's size-  
1075 dependence.

1076

### 1077 **ChIP-seq experiments**

1078 Cells expressing Swi4-V5, Swi6-V5, 3xFLAG-WHI5, 3xFLAG-WHI5, GFP-NLS-5xFLAG or LacI-GFP-  
1079 NLS-5xFLAG were grown in SC media with 2% glycerol 1% ethanol. 500 mL of cells at OD ~0.5 were  
1080 fixed with 1% formaldehyde (30 minutes) and quenched with 0.125 M glycine (5 minutes). Fixed cells  
1081 were washed twice in cold PBS, pelleted, snap-frozen and stored at -80°C. Cell lysis and ChIP  
1082 reactions were performed as previously described (Hu et al., 2015) with minor modifications. Pellets  
1083 were lysed in 300  $\mu$ L FA lysis buffer (50 mM HEPES-KOH pH 8.0, 150 mM NaCl, 1 mM EDTA, 1%  
1084 Triton X-100, 0.1% sodium deoxycholate, 1 mM PMSF, Roche protease inhibitor) with ~1 mL ceramic  
1085 beads using a Fastprep-24 (MP Biomedicals). The entire lysate was then collected and adjusted to 1  
1086 mL before sonication with a 1/8' microtip on a Q500 sonicator (Qsonica) for 15 minutes (10 seconds



1087 on, 20 seconds off). The sample tube was held suspended in a  $-20^{\circ}\text{C}$  80% ethanol bath to prevent  
1088 sample heating during sonication. Cell debris was then pelleted and the supernatant retained for ChIP.  
1089 For each ChIP reaction, 30  $\mu\text{L}$  Protein G Dynabeads (Invitrogen) were blocked (PBS + 0.5% BSA),  
1090 prebound with 10  $\mu\text{L}$  anti-V5 antibody (SV5-Pk1, BioRad Cat# MCA1360G) or 10  $\mu\text{L}$  anti-FLAG  
1091 antibody (M2, SIGMA Cat# F1804) and washed once with PBS before incubation with supernatant  
1092 ( $4^{\circ}\text{C}$ , overnight). Dynabeads were then washed (5 minutes per wash) twice in FA lysis buffer, twice in  
1093 high-salt FA lysis buffer (50 mM HepesKOH pH 8.0, 500 mM NaCl, 1 mM EDTA, 1% Triton X-100,  
1094 0.1% sodium deoxycholate, 1 mM PMSF), twice in ChIP wash buffer (10 mM TrisHCl pH 7.5, 0.25 M  
1095 LiCl, 0.5% NP-40, 0.5% sodium deoxycholate, 1 mM EDTA, 1 mM PMSF) and once in TE wash buffer  
1096 (10 mM TrisHCl pH 7.5, 1 mM EDTA, 50 mM NaCl). DNA was eluted in ChIP elution buffer (50 mM  
1097 TrisHCl pH 7.5, 10 mM EDTA, 1% SDS) at  $65^{\circ}\text{C}$  for 15-20 minutes. Eluted DNA was incubated to  
1098 reverse crosslinks ( $65^{\circ}\text{C}$ , 5 hours), before treatment with RNase A ( $37^{\circ}\text{C}$ , 1 hour) and then Proteinase  
1099 K ( $65^{\circ}\text{C}$ , 2 hours). DNA was purified using the ChIP DNA Clean & Concentrator kit (Zymo Research).  
1100 Indexed sequencing libraries were generated using the NEBNext Ultra II DNA Library Prep kit (NEB,  
1101 # E7645), pooled and sequenced on an Illumina HiSeq instrument as paired end 150 bp reads  
1102 (Genewiz, NJ).

1103

#### 1104 **ChIP-seq analysis**

1105 Demultiplexed fastq files were mapped to the sacCer3 assembly of the *S. cerevisiae* genome as  
1106  $2\times 36\text{mers}$  using Bowtie (v.1.0.1) (Langmead et al., 2009) with the following settings: -v 2 -k 2 -m 1 --  
1107 best --strata. Duplicate reads were removed using picard-tools (v.1.99). Peaks were called using  
1108 MACS2 (v.2.1.0) (Feng et al., 2012) with the following settings: -g 12000000-f BAMPE. RPM (Reads  
1109 Per Million) normalized read coverage genome browser tracks were generated using custom-written  
1110 python scripts.

1111

#### 1112 **Cell cycle and protein partitioning modeling**

1113 The cell cycle was modeled as reported in (Chandler-Brown et al., 2017). We simulated the entire cell  
1114 cycle, where cells grew and divided according to measured growth and cell cycle transition rates. This  
1115 accounts for cell-to-cell variability. To examine the role of protein partitioning in the overall scaling of  
1116 protein expression, we simulated the synthesis of a constitutively expressed protein ( $p$ ) in each cell  
1117 (Fig. 5D & S7B). Within the model, protein synthesis and partitioning properties were varied. Protein  
1118 synthesis was modelled as either scaling in proportion to cell size ( $\frac{dp}{dt} = kV$ ) or constant independent  
1119 of cell size ( $\frac{dp}{dt} = k$ ) and protein partitioning was modeled as either volume-proportional partitioning at  
1120 cytokinesis ( $(p_{mother} = p_{total} \frac{V_{mother}}{V_{mother}+V_{daughter}})$  and  $(p_{daughter} = p_{total} \frac{V_{daughter}}{V_{mother}+V_{daughter}})$ ) or partitioned in

1121 the manner empirically measured for Whi5, where a significant fraction is partitioned by amount  
1122 ( $\frac{p_{mother}}{V_{mother}} = 1.441 \frac{p_{daughter}}{V_{daughter}}$ ). Cells were simulated until a steady-state distribution was achieved and all  
1123 cells at the last time-point were plotted.
